# Supplementary material for: Extending flood forecasting lead time in large watershed by coupling WRF QPF with distributed hydrological model
Source: Copernicus journal article supplement (doi:10.5194/hess-2016-512), 2016-10-20
Supplement: Supplementary file [file hess-2016-512-AC2-supplement.pdf]

1 Extending flood forecasting lead time in large watershed by coupling WRF QPF with  
2 distributed hydrological model

3 Ji Li<sup>1</sup>, Yangbo Chen<sup>1</sup>, Huanyu Wang<sup>1</sup>, Jianming Qin<sup>1</sup>, Jie Li<sup>2</sup>, Sen Chiao<sup>3</sup>

4 <sup>1</sup>Department of Water Resources and Environment, Sun Yat-sen University, Guangzhou  
5 510275, China

6 <sup>2</sup>Hydrology Bureau, Pearl River Water Resources Commission, Guangzhou 510370,  
7 China

8 <sup>3</sup>Department of Meteorology and Climate Science, San Jose State University, San  
9 Jose, CA 95192, USA

10

11

12 *Correspondence to:* Yangbo Chen (eescyb@mail.sysu.edu.cn)

13

14 **Abstract.** Long lead time flood forecasting is very important for large watershed flood  
15 mitigation as it provides more time for flood warning and emergency responses. Latest  
16 numerical weather forecast model could provide 1-15 days quantitative precipitation  
17 forecasting products at grid format, by coupling this product with distributed  
18 hydrological model could produce long lead time watershed flood forecasting products.  
19 This paper studied the feasibility of coupling the Liuxihe Model with the WRF QPF for  
20 a large watershed flood forecasting in southern China. The QPF of WRF products has  
21 three lead time, including 24 hour, 48 hour and 72 hour, with the grid resolution being  
22 20kmx20km. The Liuxihe Model is set up with freely downloaded terrain property; the  
23 model parameters were previously optimized with rain gauge observed precipitation,  
24 and re-optimized with WRF QPF. Results show that the WRF QPF has bias with the  
25 rain gauge precipitation, and a post-processing method is proposed to post process the  
26 WRF QPF products, which improves the flood forecasting capability. With model  
27 parameter re-optimization, the model's performance improves also. This suggests that  
28 the model parameters be optimized with QPF, not the rain gauge precipitation. With the  
29 increasing of lead time, the accuracy of WRF QPF decreases, so does the flood

30 forecasting capability. Flood forecasting products produced by coupling Liuxihe Model  
31 with WRF QPF provides good reference for large watershed flood warning due to its  
32 long lead time and rational results.

33

34 **Key words :** WRF, Liuxihe Model, Flood forecasting, lead time, parameter  
35 optimization

36

### 37 **1 Introduction**

38 Watershed flood forecasting is one of the most important non-engineering measures for  
39 flood mitigation(Tingsanchali, 2012, Li et al., 2002), significant progresses in  
40 watershed flood forecasting have been made in the past decades(Borga et al., 2011,  
41 Moreno et al., 2013). Lead time is a key index for watershed flood forecasting,  
42 especially for large watershed (Toth et al., 2000, Han et al., 2007). Only flood  
43 forecasting products with long lead time are useful as they could provide enough time  
44 for flood warning and flood emergency responses. In the long practice of flood  
45 forecasting, ground based rain gauge measured precipitation is the main input for flood  
46 forecasting model, but as this kind of precipitation is the rainfall falling to the ground  
47 already, so it has no lead time. This makes the watershed flood forecasting with very  
48 short lead time (Jasper et al., 2002), and could not satisfy the requirement of flood  
49 warning (Shim et al., 2002) in lead time, particularly in large watershed, thus reducing  
50 the value of the flood forecasting products in watershed flood mitigation.

51

52 The developed numerical weather prediction models in the past decades could provide  
53 longer lead time quantitative precipitation forecast(QPF) product at grid format. The

54 lead time for the latest weather prediction model could be as long as to 1~15 days  
55 (Buizza, 1999, Ahlgrimm et al., 2016). By coupling the weather prediction model QPF  
56 with flood forecasting model, the flood forecasting lead time thus could be extended.  
57 This provides a new way for large watershed flood forecasting (Jasper et al., 2002,  
58 Zappa et al., 2010, Giard and Bazile, 2000). Many numerical weather prediction models  
59 have been proposed and put into operational use, such as the European Centre Medium-  
60 Range Weather Forecasts (ECMWF) Ensemble Prediction System (EPS) (Molteni et  
61 al., 1996, Barnier et al., 1995), the weather research and forecasting (WRF) model  
62 (Skamarock, 2005, 2008, Maussion, 2011), the numerical weather forecast model of  
63 Japan Meteorological Agency (Takenaka et al., 2011, Gao and Lian, 2006), the  
64 numerical forecast model of China Meteorological Agency (Li and Chen, 2002), and  
65 others.

66

67 Watershed flood forecasting relies on a hydrological model for computation tool, while  
68 the precipitation is the model's driving force. The earliest hydrological model is  
69 regarded as the Sherman unit-graph (Sherman, 1932), which belongs to the category of  
70 lumped hydrological model. Many lumped hydrological models have been proposed,  
71 such as the Sacramento model (Burnash, 1995), the NAM model (DHI, 2004), the  
72 Xinanjiang model (Zhao, 1977), among others. The lumped hydrological model regards  
73 the watershed as a whole hydrological unit, thus the model parameter is the same over  
74 the watershed, but this is not true, particularly for a large watershed. The precipitation  
75 the lumped hydrological model uses is averaged over the watershed also. This further  
76 increases the model's uncertainty in large watershed flood forecasting as it is well  
77 known that the precipitation distribution over the watershed is highly uneven. The QPF  
78 produced by numerical weather prediction model forecasts precipitation at grid format,

79 which provides detailed precipitation distribution information over watershed. This is  
80 another advantage of QPF. The lumped hydrological model could not take the  
81 advantage of gridded WPF products.

82

83 The latest development of watershed hydrological model is the distributed hydrological  
84 model (Refsgaard et al., 1996), which divides the watershed into grids, and different  
85 grids could have their own precipitation, terrain property and model parameter. Hence  
86 a distributed hydrological model is the ideal model for coupling WRF QPF for  
87 watershed flood forecasting. The first proposed distributed hydrological model is SHE  
88 model (Abbott et al.1986a, 1986b), and now many distributed hydrological models  
89 have been proposed, and a few have been used for watershed flood forecasting, such as  
90 the SHE model (Abbott et al.1986a, 1986b), the WATERFLOOD model (Kouwen,  
91 1988), the VIC model (Liang et al., 1994), the WetSpa model (Wang et al., 1997), the  
92 Vflo model (Vieux et al., 2002), the WEHY model(Kavvas et al., 2004), the Liuxihe  
93 model (Chen et al., 2009, 2011), among others.

94

95 As distributed hydrological model calculates the hydrological process at grid scale, so  
96 the computation time needed for running the distributed hydrological model is huge even  
97 for a small watershed. This limits the model's application in watershed flood forecasting,  
98 particularly in large watershed. Model parameter uncertainty related to distributed  
99 hydrological model also impacted its application. But with the development of parallel  
100 computation algorithm for distributed hydrological model and its deployment on  
101 supercomputer (Chen et al., 2013), the computation burden is not a great challenge of  
102 distributed hydrological modeling anymore. Also with the development of automatical

103 parameter optimization of distributed hydrological model in flood forecasting (Madsen  
104 et al., 2003, Shafii et al., 2009, Xu et al., 2012, Chen et al., 2016), the model parameters  
105 could be optimized, and the model's performance could be improved largely. With these  
106 advances, now distributed hydrological model could be used for large watershed flood  
107 forecasting.

108

109 In this paper, the WRF QPF is coupled with a distributed hydrological model-the  
110 Liuxihe model for a large watershed flood forecasting in southern China. The spatial  
111 and temporal resolution of WRF QPF is at 20km\*20km and 1 hour respectively with  
112 three lead times, including 24 hour, 48 hour and 72 hour. The WRF QPF has a similar  
113 precipitation pattern with that estimated by rain gauges, but overestimates the averaged  
114 watershed precipitation, and the longer the WRF QPF lead time, the higher the  
115 precipitation overestimation. Since WRF QPF has systematic bias compared with rain  
116 gauge precipitation, a post-processing method is proposed to post process the WRF  
117 QPF products, which improves the flood forecasting capability. The Liuxihe Model is  
118 set up with freely downloaded terrain property. The model parameters were previously  
119 optimized with rain gauge observed precipitation, and re-optimized with WRF QPF.  
120 With model parameter re-optimization, the model's performance improved. Model  
121 parameters should be optimized with QPF, not the rain gauge precipitation. Flood  
122 forecasting products produced by coupling Liuxihe Model with WRF QPF provide  
123 good reference for large watershed flood warning due to their long lead time and  
124 rational results.

125 **2 Study area and data**

126 2.1 Study area

127 Liujiang River Basin(LRB) is selected as the studied area, which is the largest first  
128 order tributary of the Pearl River with a drainage area of 58270 km<sup>2</sup>(Chen et al., 2017).  
129 LRB is in the monsoon area with heavy storms that induced severe flooding in the  
130 watershed, and caused huge flood damages in the past centuries. Fig. 1 is a sketch map  
131 of LRB.

132

133 Fig. 1 is here

134

135 2.2 Rain gauge precipitation and river flow discharge

136 Precipitation of 68 rain gauges within the watershed in 2011, 2012 and 2013 was  
137 collected and used in this study to compare with the WRF QPF. Precipitation data are  
138 at one hour interval. River discharge near the watershed outlet is collected also for this  
139 same period. As this study focuses on watershed flood forecasting, so only the  
140 precipitation and river discharge during the flood events are prepared. There is one  
141 flood event in each year. The flood events are numbered as flood event 2011, flood  
142 event 2012 and flood event 2013 respectively.

143 **3 WRF QPFs and their post-processing**

144 3.1 WRF model

145 All simulations for this study were conducted with the Advanced Research WRF  
146 (WRF-ARW) model version 3.4 (Skamarock et al. 2008). WRF-ARW model is 3-D,

147 non-hydrostatic, fully compressible, and has the terrain-following sigma coordinate  
148 system. The model is considered as the next generation's medium range weather  
149 forecasting model, and can simulate different weather processes from cloud scale to  
150 synoptic scale, especially in horizontal resolution of 1 ~ 10 km. The model also  
151 integrates the advanced numerical methods and data assimilation techniques, a variety  
152 of physically process schemes, and multiple nested methods and the capability of being  
153 used in different geographical locations. WRF-ARW model satisfies the needs of  
154 scientific research and practical applications for this study.

155

156 Prior studies have been shown in quantitative precipitation forecasting by using WRF-  
157 ARW model. For instance, Pennelly et al. (2014) employed the WRF model to predict  
158 three precipitation events of Alberta, Canada, and compared the precipitation with 48  
159 hour leading time predicted by the model with rain gauges. The results showed that  
160 Kain-Fritsch cumulus parameterization overestimated the value of precipitation  
161 invariably. Eiserloh and Chiao (2015) used WRF-ARW with data assimilation to  
162 investigate an Atmospheric River event over Northern California. Maussion et al. (2011)  
163 compared the capability of WRF model in retrieving monthly precipitation and  
164 snowfall at three different spatial resolution including 30, 10 and 2 km domains over  
165 Tibet. Their results showed that the model was able to recapture monthly precipitation  
166 and snowfall. Pan et al. (2012) used two WRF simulation groups between pre-process  
167 and post-process in Heihe river basin, and compared and analyzed the mean bias error,  
168 root mean square error and correlation coefficient of the two WRF groups. Huang et al.  
169 (2011) found that variations in the microphysical process parameterization schemes  
170 had much more influence on precipitation than that of cumulus parameterization  
171 schemes, especially for a torrential rain attributed to large-scale forcing that mainly

172 resulted from stratus clouds. Kumar et al. (2008) used WRF model to study a heavy  
173 rain in 2005, their results showed that WRF model could reproduce the storm event and  
174 its dynamical and thermo-dynamical characteristics. Hong and Lee (2009) conducted a  
175 triply nested WRF simulation for convective initiation of a thunderstorm. Givati et al.  
176 (2012) predicted the hiemal precipitation event of 2008 and 2009 based on WRF model  
177 in upstream of the Jordan River, and coupled WRF model with hydrological model-  
178 HYMKE to simulate the velocity and discharge of Jordan River. Sensitivity experiment  
179 of WRF microphysical schemes by Niu et al. (2007) have shown the adequate  
180 performance of precipitation predicted associated with region, center location and  
181 rainfall intensity. Xu et al.(2007) compared the hiemal continuous precipitation process  
182 predicted with the estival results by WRF model, the results showed that the KF scheme  
183 was better than BM scheme in summer. Hu et al. (2008) found that the parameterization  
184 scheme of WRF model was related to the model resolution, and the parameterization  
185 scheme should be selected by the resolution of WRF model.

### 186 3.2 Configuration of WRF for LRB B

187 The WRF-ARW was applied to LRB following the configurations by Li et al. (2015).  
188 More information about LBR can be found in Li et al. (2015) and Chen et al. (2017).  
189 The model domain is centered at 23.8N, 109.2W with the Lambert conformal projection.  
190 The vertical structure includes 28 levels with the focus on the lower-levels of  
191 troposphere. The initial and time-dependent lateral boundary conditions are supplied  
192 from NCEP Global Forecast System (GFS) 3-hourly global analysis at 0.5 °horizontal  
193 resolution. The model domain has a 20 km grid resolution. The single-moment 3-class  
194 microphysics (WSM3) parameterization (Hong and Lim, 2006) is adopted for this study.  
195 Kain-Fritsch cumulus parameterization (Kain, 2004) as well as the YSU boundary layer  
196 microphysics scheme (Hong et al., 2006) are used. Other physics schemes used



197 include the NOAH scheme for the land surface physics (Ek et al., 2003), the Goddard  
198 scheme for the shortwave radiation physics (based on Chou and Suarez,1994), and  
199 Rapid Radiative Transfer Model (RRTM) scheme for the longwave radiation physics  
200 (Mlawer et al., 1997).

201

202 The spatial and temporal resolution of WRF is at 20km x 20km and 1 hour, respectively.  
203 The entire Liujiang River Basin is covered by total 156 grid points of the WRF model.  
204 The simulated QPF for flood events in years 2011 to 2013 were produced with three  
205 different lead time (i.e., 24 hours, 48 hours and 72 hours), respectively. As shown in  
206 Figs. 2-4, the WRF QPF products in in three different years, while (a) is the rain gauge  
207 precipitation, (b) is the WRF QPF with 24 hour lead time, (c) is the WRF QPF with 48  
208 hour lead time, and (d) is the WRF QPF with 72 hour lead time.

209 Fig. 2 is here

210 Fig. 3 is here

211 Fig. 4 is here

### 212 3.3 Evaluation of WRF QPF and rain gauges precipitation

213 Comparisons of WRF QPF and rain gauge precipitation are performed. From the  
214 simulated results, as shown in Figs. 2, 3 and 4, it appears that the temporal  
215 precipitation pattern of both products is similar, although there are some insignificant  
216 differences. To make further comparison, the accumulated precipitation of the three  
217 flood events averaged over the watershed are calculated and listed in Table 1.

218

219 Table 1 is here

220

221 As summarized in Table 1, it could be found that the WRF QPF accumulated  
222 precipitation has obvious bias with rain gauge accumulated precipitation. For all the  
223 three flood events, the WRF QPF accumulated precipitation are higher than those  
224 measured by rain gauges. In other words, the WRF QPF overestimates the  
225 precipitation. For flood event 2011, the overestimated watershed averaged  
226 precipitation of WRF QPF with lead time of 24 hour, 48 hour and 72 hour are 23%,  
227 32% and 55% respectively. For the flood event in 2012, they are 16%, 37% and 71%  
228 respectively. They are 50%, 73% and 95% respectively from the event in 2013. The  
229 results suggest that longer the WRF QPF lead time, the higher chance of  
230 overestimation.

### 231 3.4 WRF QPF statistical calibrations

232 From the simulated results (c.f., Fig. 2, 3 and 4, and Table 1), the WRF QPF has  
233 significant bias compared to rain gauge precipitation. Assuming the rain gauge  
234 precipitation is correct, the WRF QPF needs to be further calibrated. In order to do so,  
235 the WRF QPF is further post-processed based on the rain gauge precipitation to  
236 correct the systematic error of WRF QPF. The principle of WRF QPF statistical  
237 calibrations proposed in this study is to keep the areal averaged event accumulated  
238 precipitation from both model and rain gauge products to be equivalent. In other  
239 words, the statistical approach is to nudge the WRF QPF precipitation to rain gauge  
240 results.

241

242 Based on this principle, the WRF QPF post-processing procedure is summarized as  
243 follows:

244

245 1) Calculate the areal average precipitation of the WRF QPF for each flood events  
246 over the watershed as following equation.

$$247 \quad \bar{P}_{WRF} = \frac{\sum_{i=1}^N P_i F_i}{N} \quad (1)$$

248 Where,  $\bar{P}_{WRF}$  is the areal average precipitation of WRF QPF of one flood event,  $P_i$  is  
249 the precipitation on WRF grid i,  $F_i$  is the surface area of WRF grid i divided by the  
250 whole watershed drainage area,  $N$  is the total number of WRF grids.

251

252 2) Calculate the areal average precipitation of the rain gauges with the following  
253 equation.

$$254 \quad \bar{P}_2 = \frac{\sum_{j=1}^M P_j}{M} \quad (2)$$

255 Where,  $\bar{P}_2$  is the areal average precipitation of the rain gauges network,  $P_j$  is the  
256 precipitation observed by jth rain gauge,  $M$  is the total number of rain gauges.

257

258 3) The precipitation of every WRF QPF grids then could be revised with the  
259 following equation.

260 
$$P'_i = P_i \frac{\bar{P}_2}{\bar{P}_{WRF}} \quad (3)$$

261 Where,  $P'_i$  is the revised precipitation of ith WRF grid.

262 With the above WRF QPF statistical calibration methods, the WRF QPF of flood  
263 event 2011, 2012 and 2013 are post-processed, and will be used to couple with the  
264 Liuxihe Model for flood simulations.

## 265 **4 Hydrological model**

### 266 4.1 Liuxihe Model

267 Liuxihe model is a physically based fully distributed hydrological model proposed  
268 mainly for watershed flood forecasting (Chen, 2009, Chen et al., 2011), and has been  
269 used in a few watersheds for flood forecasting(Chen, 2009, Chen et al., 2011, 2013,  
270 2016, Liao et al., 2012 a, b, Xu et al., 2012 a, b). In Liuxihe Model, runoff components  
271 are calculated at grid scale, runoff routes at both grid and watershed scale. Runoff  
272 routing is divided into hill slope routing and river channel routing by using different  
273 computation algorithm. Liuxihe Model proposed an automatic parameter optimization  
274 method using PSO algorithm (Chen et al., 2016), which largely improves the model's  
275 performance in watershed flood forecasting. Now Liuxihe Model is deployed on a  
276 supercomputer system with parallel computation techniques (Chen et al., 2013) that  
277 largely facilitates the model parameter optimization of Liuxihe Model.

278

279 Chen et al. (2017) set up Liuxihe Model in LRB with freely downloaded terrain  
280 property data from the website at a spatial resolution of 200m\*200m, and optimized  
281 model parameters with observed hydrological data. The model was validated by  
282 observed flood events data, and the model performance was found rational and could

283 be used for real-time flood forecasting. The model only uses rain gauge precipitation,  
284 so its flood forecasting lead time is limited. In this study, the Liuxihe Model was set up  
285 in LRB and the optimized model parameters were be used in this study as the first  
286 attempt. Fig. 5 shows the model structure.

287

288

Fig.5 is here

289

#### 290 4.2 Liuxihe Model parameter optimization

291 While the model parameters optimization by Chen et al. (2017) is done by using the  
292 rain gauge precipitation, this study uses the WRF QPF as the precipitation input. So the  
293 parameters of Liuxihe Model that were set up in LRB may not be appropriate for  
294 coupling the WRF QPF. For this reason, considering Liuxihe Model is a physically  
295 based distributed hydrological model, the parameters were optimized again by using  
296 the WRF QPF flood event in 2011. Hence, the WRF QPF is the post-processed one, not  
297 the original one. Results of parameter optimization are shown in Fig. 6. Among them,  
298 (a) is the objective function evolution result, (b) is the parameters evolution result, and  
299 (c) is the simulated flood process by using the optimized model parameters. To compare,  
300 the simulated flood process of flood event 2011 was also drawn in Fig. 6(c).

301

302

Fig. 6 is here

303

304 From the result of Fig. 6(c), it may be seen that the optimized model parameters with  
305 WRF QPF improved the flood simulation when compared to the corresponding flood  
306 simulation based on gauge precipitation. This means parameter optimization with

307 WRF QPF is necessary.

#### 308 4.3 Coupling WRF QPF with Liuxihe Model for LRB flood forecasting

309 When the Liuxihe Model set up for LRB flood forecasting (Chen et al., 2017) was  
310 employed to couple with the WRF QPF, the model spatial resolution remained to be  
311 200m\*200m. As the spatial resolution of WRF QPF is at 20km\*20km, the WRF QPF  
312 was downscaled to the resolution of 200m\*200m by using the nearest downscaling  
313 method, the same spatial resolution of the flood forecasting model.

### 314 **5 Results and discussions**

#### 315 5.1 Effects of WRF post-processing

316 The original WRF QPF and the post-processed QPF were used to couple with the  
317 Liuxihe Model. In this simulation, the original model parameters that were optimized  
318 with the rain gauge precipitation were employed, not the re-optimized model  
319 parameters. The simulated results are shown in Fig. 7, 8 and 9.

320

321 Fig. 7 is here

322 Fig. 8 is here

323 Fig. 9 is here

324

325 From the above results, it could be seen that the simulated flood discharges with the  
326 original WRF QPF are much lower than the observed ones. But with post-processed  
327 WRF QPF used, the simulated flood discharge increased and became much more close  
328 to the observation. This implies that the flood forecasting capability has been improved

329 by post-processing of WRF QPF. To further compare the three results, 5 evaluation  
330 indices, including Nash-Sutcliffe coefficient(C), correlation coefficient(R), process  
331 relative error(P), peak flow relative error(E) and water balance coefficient(W) were  
332 calculated and listed in Table 2.

333

334

Table 2 is here

335

336 From the results of Table 2, it has been found that all the 5 evaluation indices have been  
337 improved by coupling the post-processed WRF QPF. For example, for flood event 2011  
338 with 24 hour lead time, the Nash-Sutcliffe coefficient/C, correlation coefficient/R,  
339 process relative error/P, peak flow relative error/E and coefficient of water balance/W  
340 with original WRF QPF are 0.65, 0.88, 35%, 14% and 1.44 respectively, but those with  
341 the post-processed WRF QPF are 0.75, 0.93, 23%, 8% and 1.15 respectively. For flood  
342 event 2012 with 48 hour lead time, the above 5 evaluation indices with original WRF  
343 QPF are 0.63, 0.75, 48%, 12% and 1.43 respectively, and are 0.75, 0.84, 26%, 8% and  
344 1.32 respectively with the post-processed WRF QPF. For flood event 2013 with 72 hour  
345 lead time, the above 5 evaluation indices with original WRF QPF are 0.44, 0.75, 129%,  
346 45% and 1.66 respectively, and are 0.55, 0.82, 98%, 23%, 1.25 respectively with the  
347 post-processed WRF QPF. It is obvious that with the post-processed WRF QPF, the  
348 evaluation indices are improved substantially. These results show that WRF QPF post  
349 processing could improve the flood forecasting capability because the WRF QPF is  
350 more close to the observed precipitation after post-processing. So it should be practiced  
351 for real-time flood forecasting.

352

353 5.2 Results comparison for different model parameters

354 The model parameters optimized with rain gauge precipitation and WRF QPF are  
355 different; so different parameter values will result in different model performance. To  
356 analyze this effect, the flood events of 2012 and 2013 with two different sets of model  
357 parameters values are simulated, and are shown in Fig. 10 and Fig. 11 respectively.  
358 Only the post-processed WRF QPF are coupled in this simulation.

359

360 Fig. 10 is here

361 Fig. 11 is here

362

363 From the above figures it may be that the simulated flood results with re-optimized  
364 model parameters are better than those simulated with the original model parameters.  
365 The simulated flood discharge with the re-optimized model parameters matches. To  
366 further compare the two results, 5 evaluation indices, including Nash-Sutcliffe  
367 coefficient(C), correlation coefficient(R), process relative error(P), peak flow relative  
368 error(E) and water balance coefficient(W) are calculated and listed in Table 3.

369

370 Table 3 is here

371

372 From the results of Table 3, it is found that the results of flood simulation based on the  
373 re-optimized model parameters have better evaluation indices. All evaluation indices  
374 for those based on re-optimized model parameters are improved. For example, for flood  
375 event 2012 with 24 hour lead time, the Nash-Sutcliffe coefficient/C, correlation  
376 coefficient/R, process relative error/P, peak flow relative error/E and coefficient of



377 water balance/W with original model parameters are 0.58, 0.82, 35%, 12% and 1.08  
378 respectively, but those with the re-optimized model parameters are 0.74, 0.86, 28%, 8%  
379 and 0.95 respectively. For flood event 2013 with 48 hour lead time, the 5 indices with  
380 the original model parameters are 0.62, 0.86, 22%, 13% and 1.24 respectively, and are  
381 0.68, 0.89, 18%, 9% and 1.06 respectively for those with re-optimized model  
382 parameters. So it could be said that in coupling the WRF QPF with distributed  
383 hydrological model, the model parameters need to be re-optimized with the WRF QPF.  
384 This finding implies that the precipitation pattern has obvious impact on model  
385 parameters. It should be considered, and model parameter optimization is a rational way  
386 for considering this effect.

### 387 5.3 Flood simulation accuracy with different lead time

388 To compare the model performance with different lead time, the flood events with 3  
389 different lead times are simulated and shown in Fig. 12. The model parameters are the  
390 re-optimized ones, and the QPF is the post-processed QPF.

391

392 Fig. 12 is here

393

394 From the results of Fig. 12, it could be seen that the flood simulation result get worse  
395 as the lead time increases, i.e., the model performance with 24 hour lead time is better  
396 than that with 48 hour lead time, and the model performance with 48 hour lead time is  
397 better than that with 72 hour lead time. The simulated hydrological process with 24  
398 hour lead time is very similar to that simulated with rain gauge precipitation. To further  
399 compare the results, 5 evaluation indices, including Nash-Sutcliffe coefficient(C),  
400 correlation coefficient(R), process relative error(P), peak flow relative error(E) and  
401 water balance coefficient(W) were calculated and listed in Table 4.

402

403

Table 4 is here

404

405 From the results of Table 4, it is found that the simulated flood events with 24 hour lead  
406 time have best evaluation indices, and are very close to those simulated with rain gauge  
407 precipitation. For flood event 2012, the Nash-Sutcliffe coefficient/C, correlation  
408 coefficient/R, process relative error/P, peak flow relative error/E and coefficient of  
409 water balance/W with rain gauge are 0.82, 0.89, 20%, 5% and 0.8 respectively, while  
410 those with 24 hour lead time are 0.74, 0.86, 28%, 8% and 0.95 respectively, those with  
411 48 hour lead time are 0.63, 0.84, 48%, 12% and 1.32 respectively, and are 0.56, 0.56,  
412 56%, 18% and 1.54 respectively for 72 hour lead time. For flood event 2013, the Nash-  
413 Sutcliffe coefficient/C, correlation coefficient/R, process relative error/P, peak flow  
414 relative error/E and coefficient of water balance/W with rain gauge are 0.95, 0.92, 8%,  
415 6% and 1.08 respectively, while those with 24 hour lead time are 0.87, 0.87, 9%, 12%  
416 and 1.02 respectively, those with 48 hour lead time are 0.62, 0.86, 22%, 13% and 1.24  
417 respectively, and are 0.61, 0.87, 75%, 17% and 1.66 respectively for 72 hour lead time.  
418 This finding means that the current WRF QPF capability is lead-time dependent, and  
419 with the increasing lead time, the practical value of WRF QPF gets lower.

## 420 **6 Conclusion**

421 In this study, the WRF QPF was coupled with a distributed hydrological model-the  
422 Liuxihe model, for large watershed flood forecasting, and three lead times of WRF QPF  
423 products, including 24 hours, 48 hours and 72 hours are tested. WRF QPF post  
424 processing method is proposed and tested, model parameters are re-optimized by using  
425 the post-processed WRF QPF, model performances are compared among various

426 conditions. Based on the results of this study, the following conclusions could be drawn:

427

428 1) The quantitative precipitation forecasting produced by WRF model has a similar  
429 pattern with that estimated by rain gauges temporally, but overestimated the averaged  
430 watershed precipitation for the event accumulated total precipitation. The longer the  
431 WRF QPF lead time, the higher the precipitation overestimation. For flood event 2011,  
432 the overestimated watershed averaged precipitation of WRF QPF with lead times of 24  
433 hour, 48 hour and 72 hour are 23%, 32% and 55% respectively. For flood event 2012,  
434 these are 16%, 37% and 71% respectively, while for flood event 2013, these are 50%,  
435 73% and 95% respectively.

436

437 2. WRF QPF has systematic bias compared with rain gauge precipitation, and this  
438 bias could be reduced via post-processing. Principle used in this study for WRF QPF  
439 post processing is effective and could improve the flood forecasting capability. For  
440 flood event 2011 with 24 hour lead time, the Nash-Sutcliffe coefficient/C, correlation  
441 coefficient/R, process relative error/P, peak flow relative error/E and coefficient of  
442 water balance/W with original WRF QPF are 0.65, 0.88, 35%, 14% and 1.44  
443 respectively, but those with the post-processed WRF QPF are 0.75, 0.93, 23%, 8%  
444 and 1.15 respectively. For flood event 2012 with 48 hour lead time, the above 5  
445 evaluation indices with original WRF QPF are 0.63, 0.75, 48%, 12% and 1.43  
446 respectively, and are 0.75, 0.84, 26%, 8% and 1.32 respectively with the post-  
447 processed WRF QPF. For flood event 2013 with 72 hour lead time, the above 5  
448 evaluation indices with original WRF QPF are 0.44, 0.75, 129%, 45% and 1.66  
449 respectively, and are 0.55, 0.82, 98%, 23%, 1.25 respectively with the post-processed  
450 WRF QPF.

451

452 3. Hydrological model parameters optimized with the rain gauge precipitation need to  
453 be re-optimized using the post-processed WRF QPF, this improves the model  
454 performance significantly. That is, in coupling the distributed hydrological model with  
455 QPF for flood forecasting, the model parameters should be optimized with the QPF  
456 produced by WRF. For flood event 2012 with 24 hour lead time, the Nash-Sutcliffe  
457 coefficient/C, correlation coefficient/R, process relative error/P, peak flow relative  
458 error/E and coefficient of water balance/W with original model parameters are 0.58,  
459 0.82, 35%, 12% and 1.08 respectively, but those with the re-optimized model  
460 parameters are 0.74, 0.86, 28%, 8% and 0.95 respectively. For flood event 2013 with  
461 48 hour lead time, the 5 indices with the original model parameters are 0.62, 0.86, 22%,  
462 13% and 1.24 respectively, and are 0.68, 0.89, 18%, 9% and 1.06 respectively for those  
463 with re-optimized model parameters.

464

465 4. The simulated floods by coupling WRF QPF with distributed hydrological model are  
466 rational and could benefit the flood management communities due to their longer lead  
467 times for flood warning. They provide a good reference for large watershed flood  
468 warning. But with the lead time getting longer, the flood forecasting accuracy is getting  
469 lower. For flood event 2012, the Nash-Sutcliffe coefficient/C, correlation coefficient/R,  
470 process relative error/P, peak flow relative error/E and coefficient of water balance/W  
471 with rain gauge are 0.82, 0.89, 20%, 5% and 0.8 respectively, while those with 24 hour  
472 lead time are 0.74, 0.86, 28%, 8% and 0.95 respectively, those with 48 hour lead time  
473 are 0.63, 0.84, 48%, 12% and 1.32 respectively, and are 0.56, 0.56, 56%, 18% and 1.54  
474 respectively for 72 hour lead time. For flood event 2013, the Nash-Sutcliffe  
475 coefficient/C, correlation coefficient/R, process relative error/P, peak flow relative

476 error/E and coefficient of water balance/W with rain gauge are 0.95, 0.92, 8%, 6% and  
477 1.08 respectively, while those with 24 hour lead time are 0.87, 0.87, 9%, 12% and 1.02  
478 respectively, those with 48 hour lead time are 0.62, 0.86, 22%, 13% and 1.24  
479 respectively, and are 0.61, 0.87, 75%, 17% and 1.66 respectively for 72 hour lead time.

## 480 **7 Data availability**

481 The Rain gauge precipitation and river flow discharge data were provided by the  
482 Bureau of Hydrology, Pearl River Water Resources Commission, China exclusively  
483 used for this study. The WRF QPF results were provided by Yuan Li, and has been  
484 published and cited in this paper (Li et al. 2015). The Liuxihe Model used in this  
485 study are provided by Yangbo Chen, and has been published and cited in this paper  
486 (Chen et al. 2017).

487

488 **Competing interests.** The authors declare that they have no conflict of interest.

489

## 490 **Acknowledgements**

491 This study is supported by the Special Research Grant for the Water Resources Industry  
492 (funding no. 201301070), the National Science Foundation of China (funding no.  
493 50479033), and the Basic Research Grant for Universities of the Ministry of Education  
494 of China (fundingno.13lgjc01).

495

496

497 **Figures**

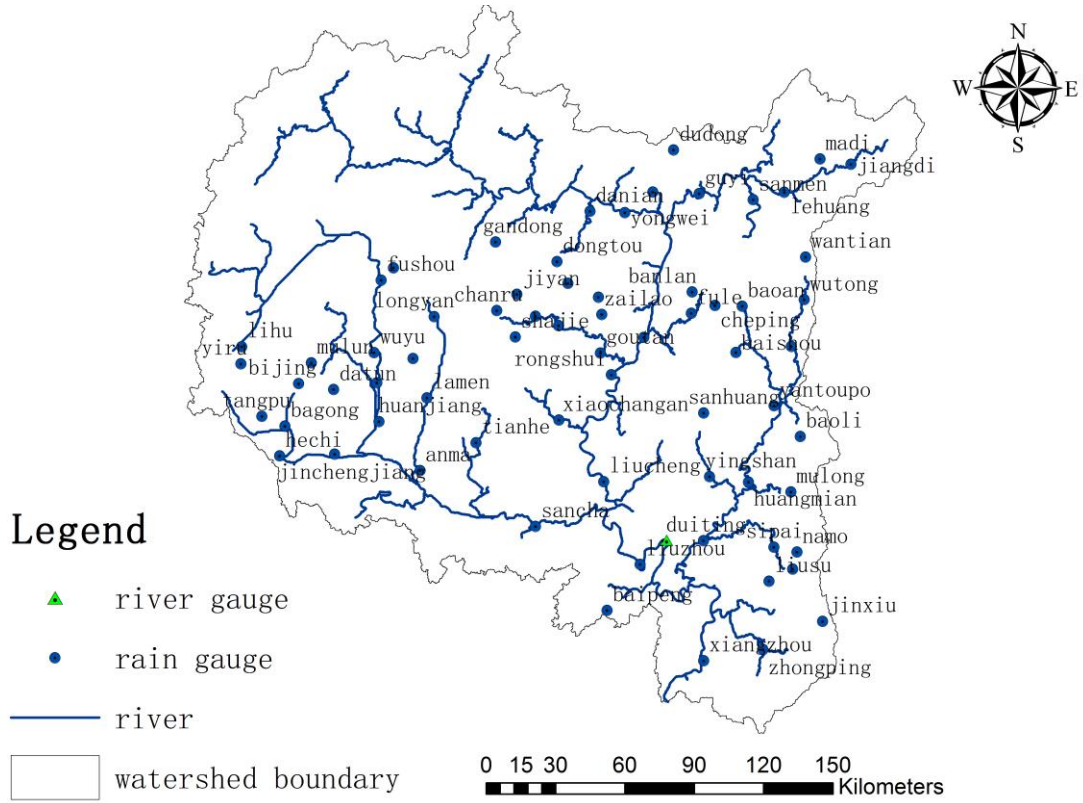

498

499

Fig. 1 Sketch map of Liujiang River Basin( Chen et al., 2017)

500

501

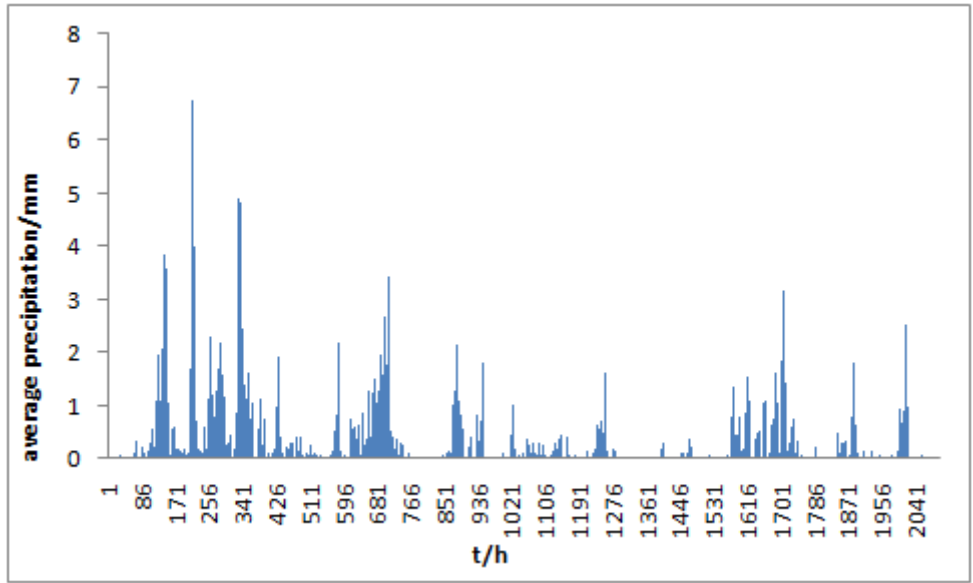

502

503

(a)

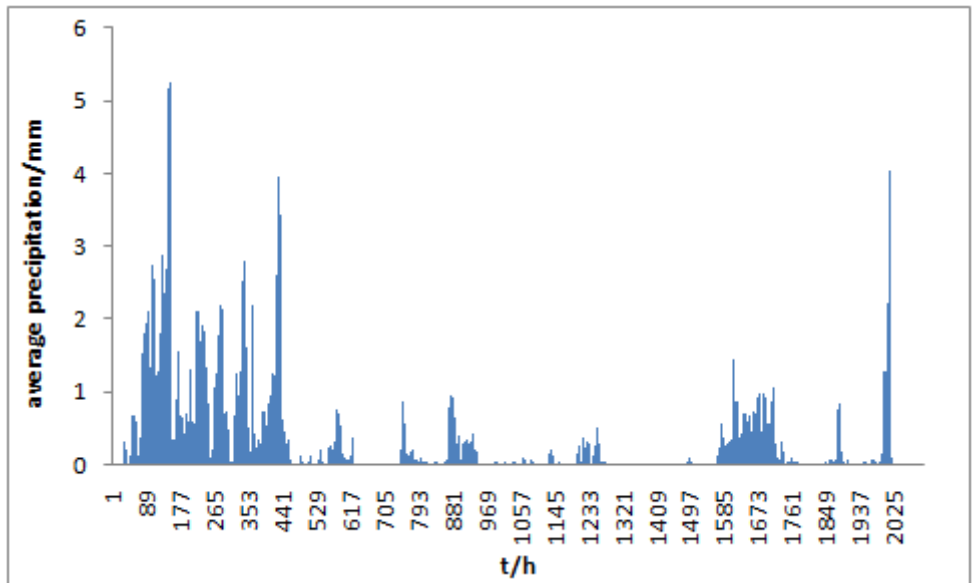

504

505

(b)

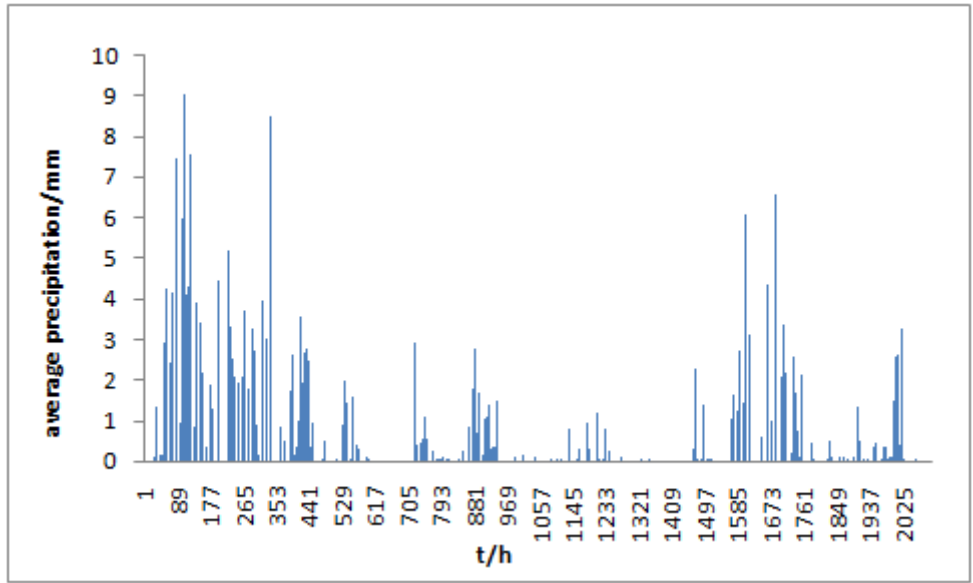

506  
507

(c)

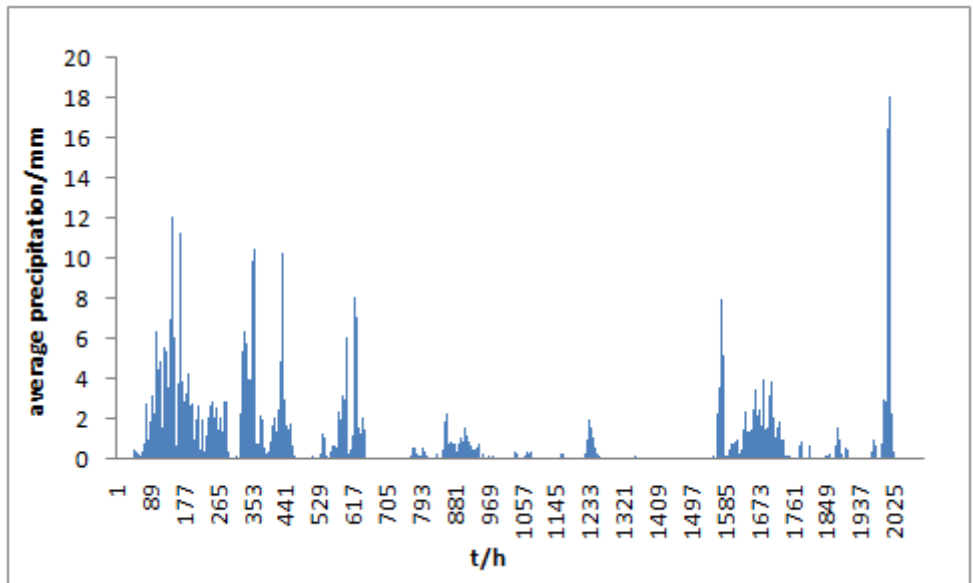

508  
509

(d)

510 Fig. 2 Precipitation pattern comparison of two precipitation products(2011), (a) is the  
511 average precipitation of rain gauges, (b) is the average precipitation of WRF with 24  
512 hour lead time, (c) is the average precipitation of WRF with 48 hour lead time, (d) is  
513 the average precipitation of WRF with 72 hour lead time.

514



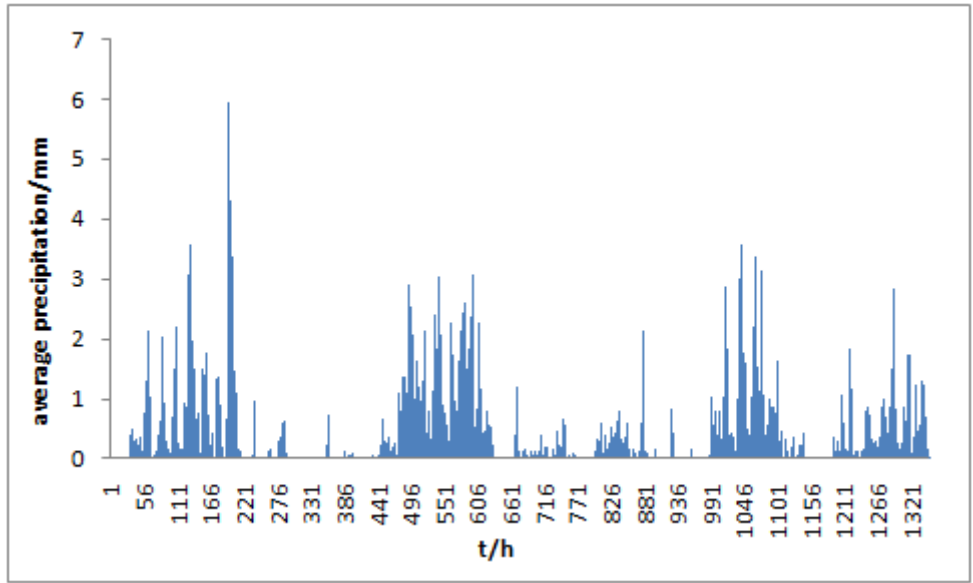

515

516

(a)

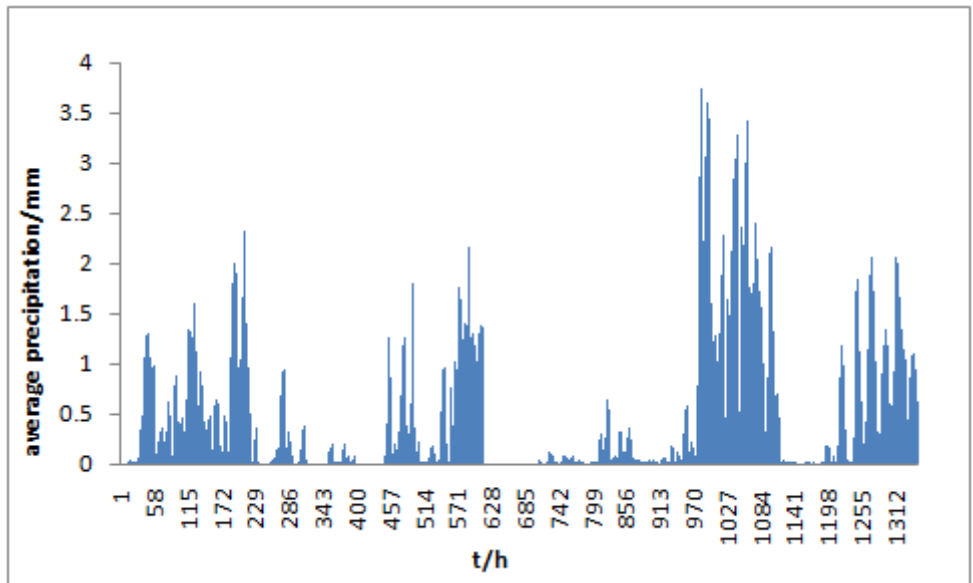

517

518

(b)

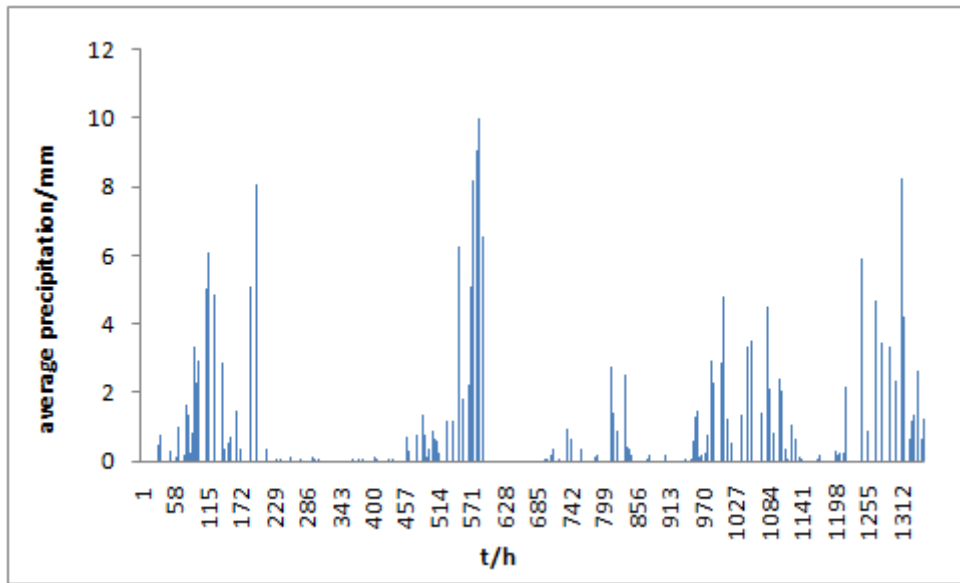

519  
520

(c)

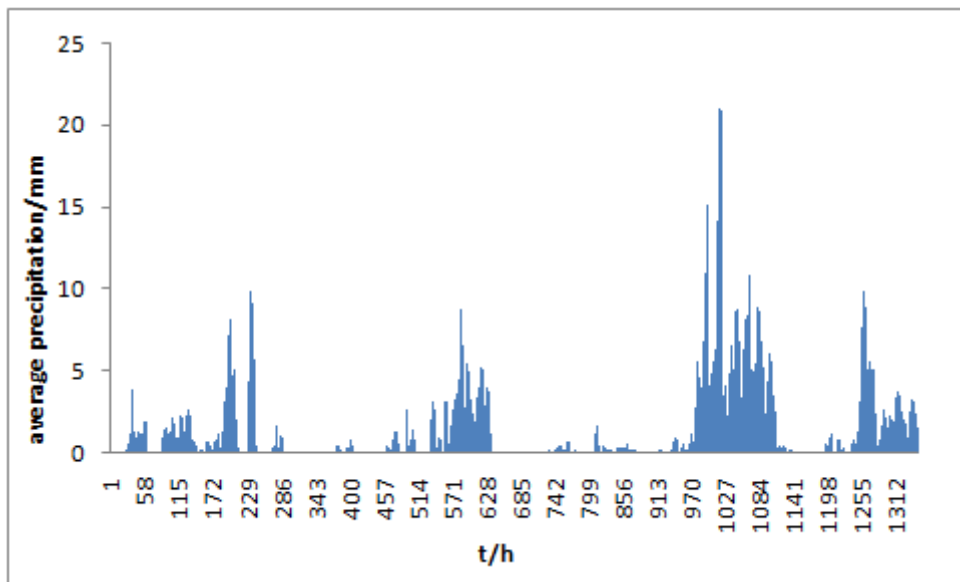

521  
522

(d)

523 Fig. 3 Precipitation pattern comparison of two precipitation products(2012) , (a) is the  
524 average precipitation of rain gauges, (b) is the average precipitation of WRF with 24  
525 hour lead time, (c) is the average precipitation of WRF with 48 hour lead time, (d) is  
526 the average precipitation of WRF with 72 hour lead time.

527

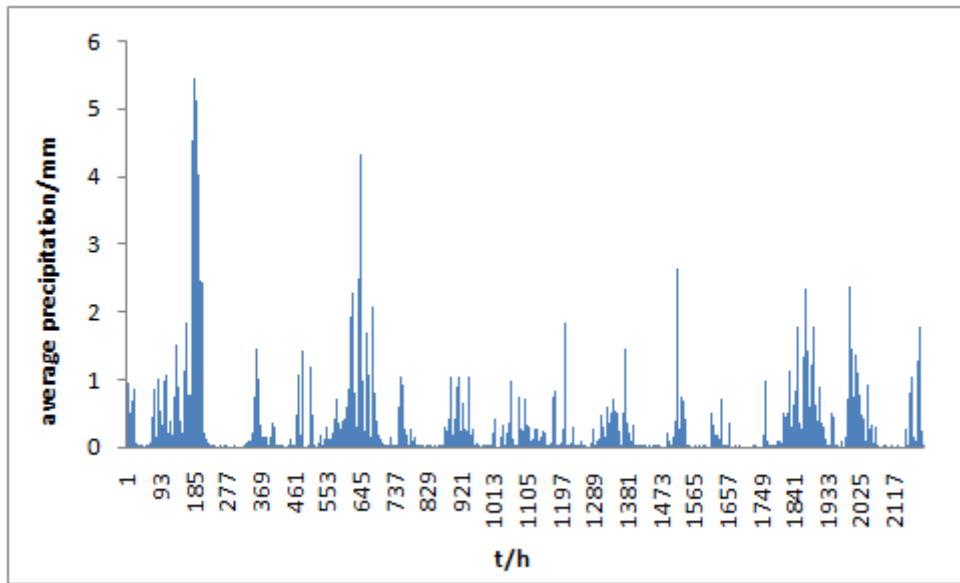

528

529

(a)

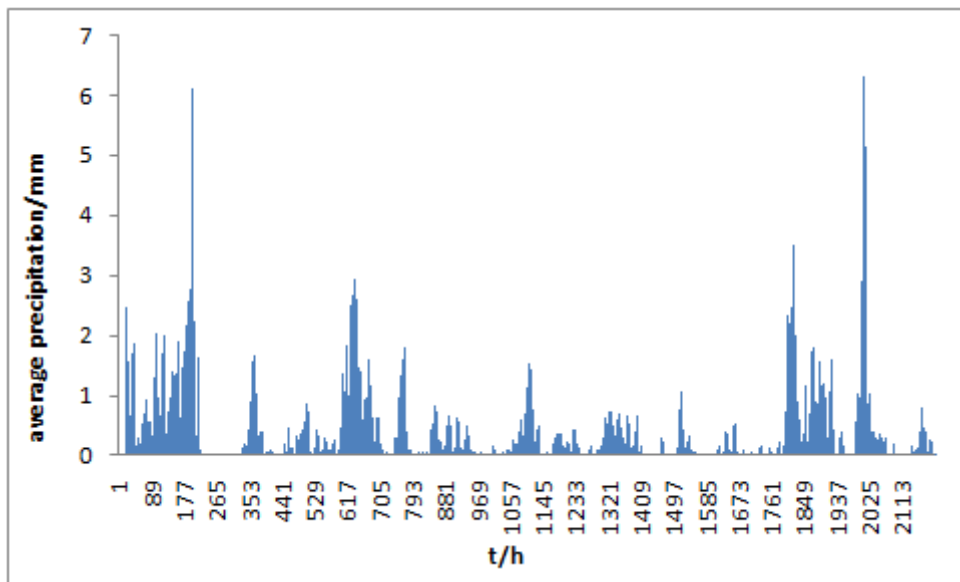

530

531

(b)

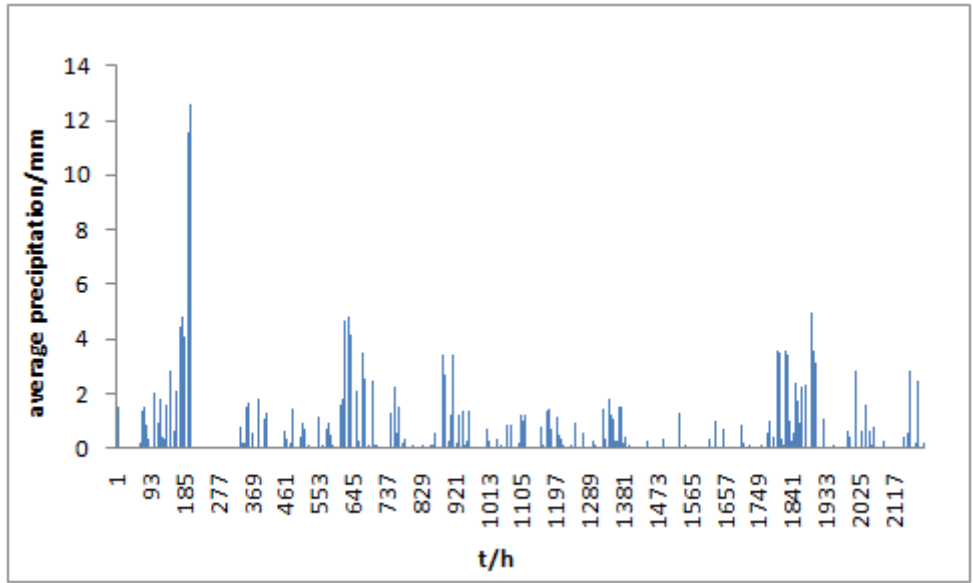

532

533

(c)

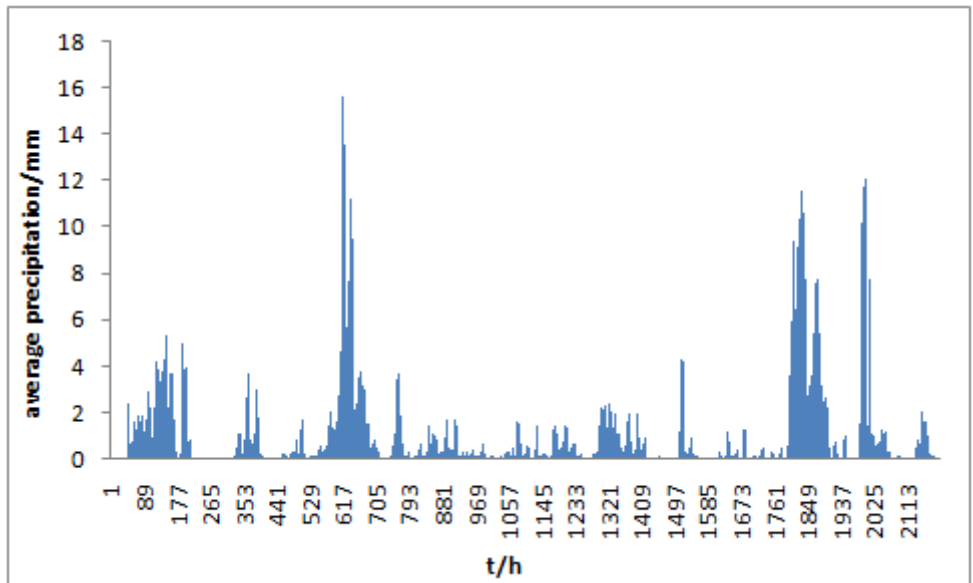

534

535

(d)

536 Fig. 4 Precipitation pattern comparison of two precipitation products(2013), (a) is the  
 537 average precipitation of rain gauges, (b) is the average precipitation of WRF with 24  
 538 hour lead time, (c) is the average precipitation of WRF with 48 hour lead time, (d) is  
 539 the average precipitation of WRF with 72 hour lead time.

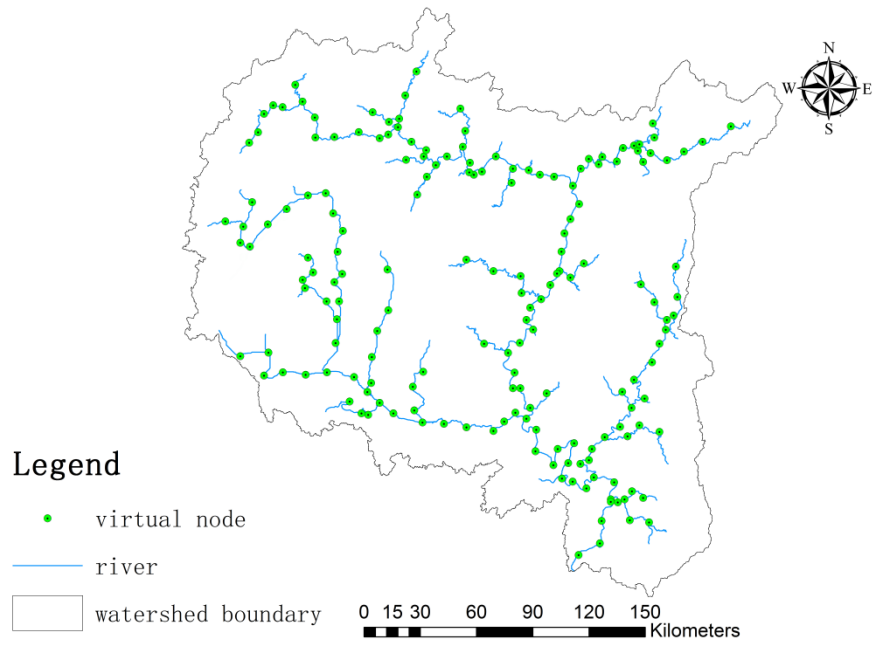

540

541 Fig.5 Liuxihe Model structure of LRB (200m×200m resolution, Chen et. al., 2017)

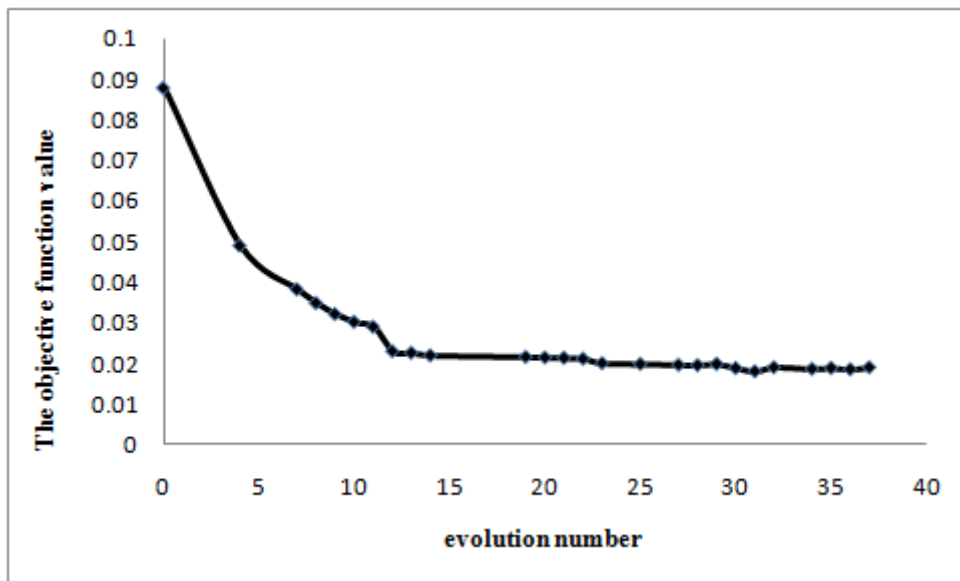

542

543

(a) Evolutionary process of objective function

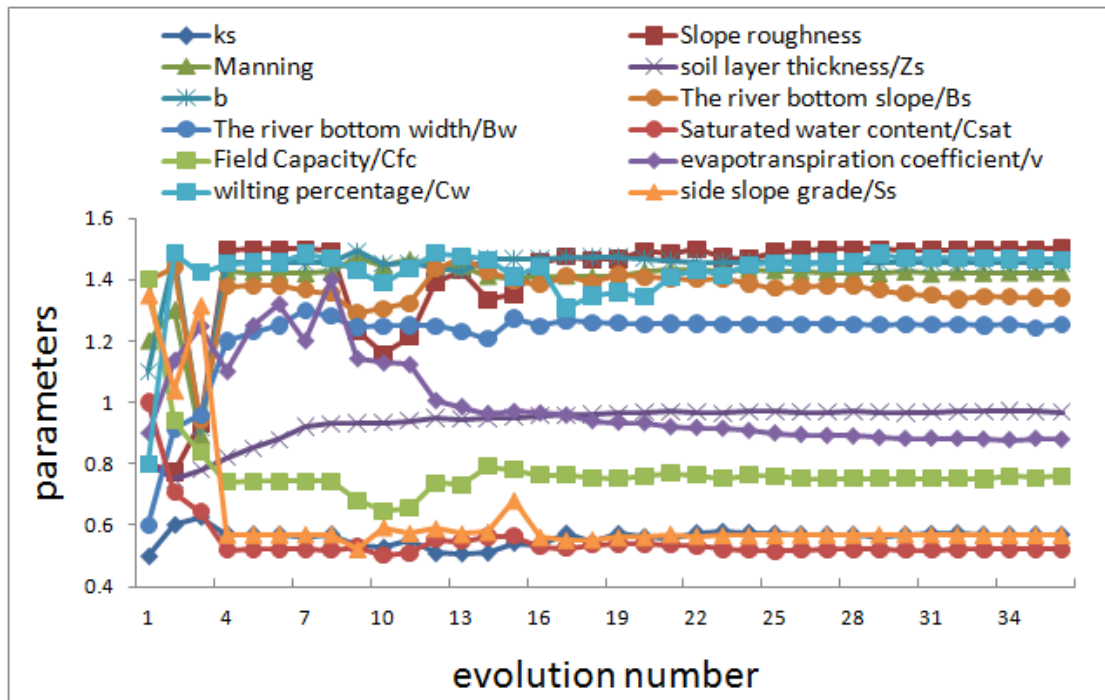

544  
545

(b) Parameter evolution process

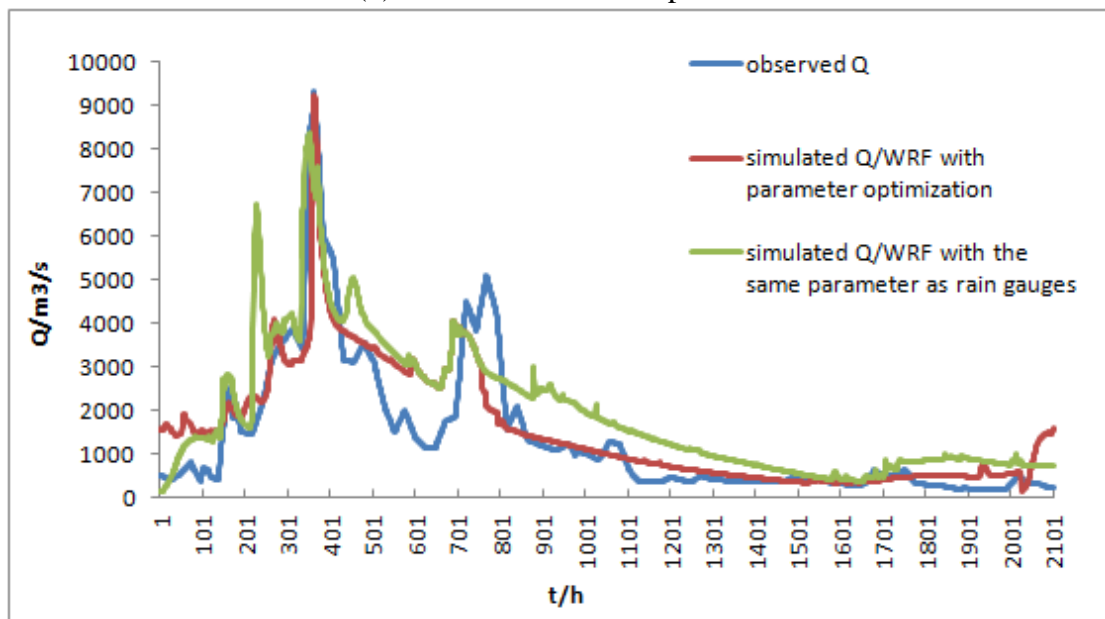

546  
547  
548  
549

(c) Simulated flood process with optimized model parameters

Fig. 6 Parameter optimization results of Liuxihe Model for LRB with WRF QPF

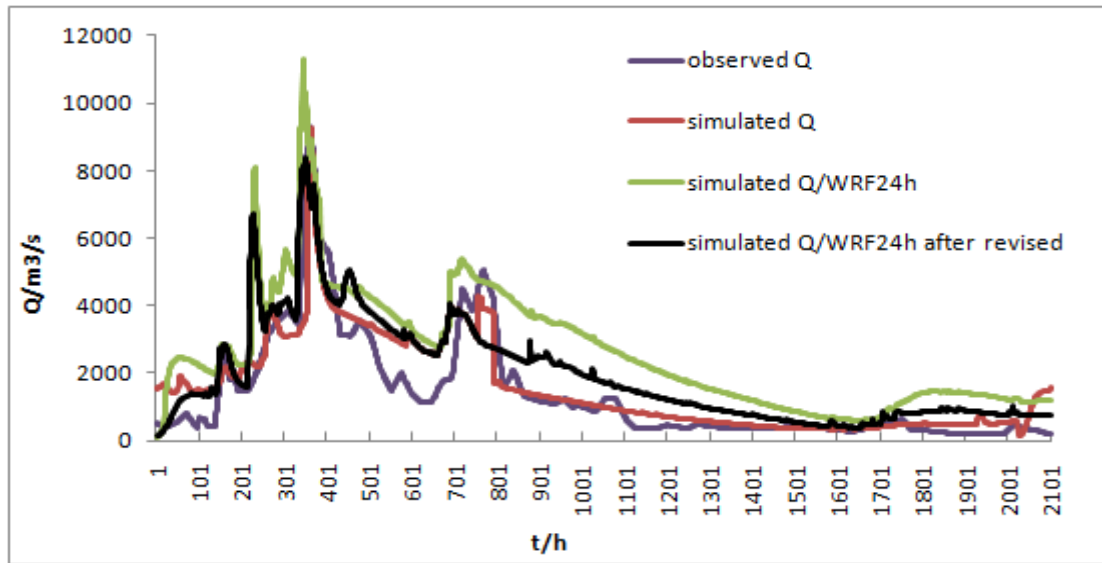

550

551

(a) 24 hour lead time

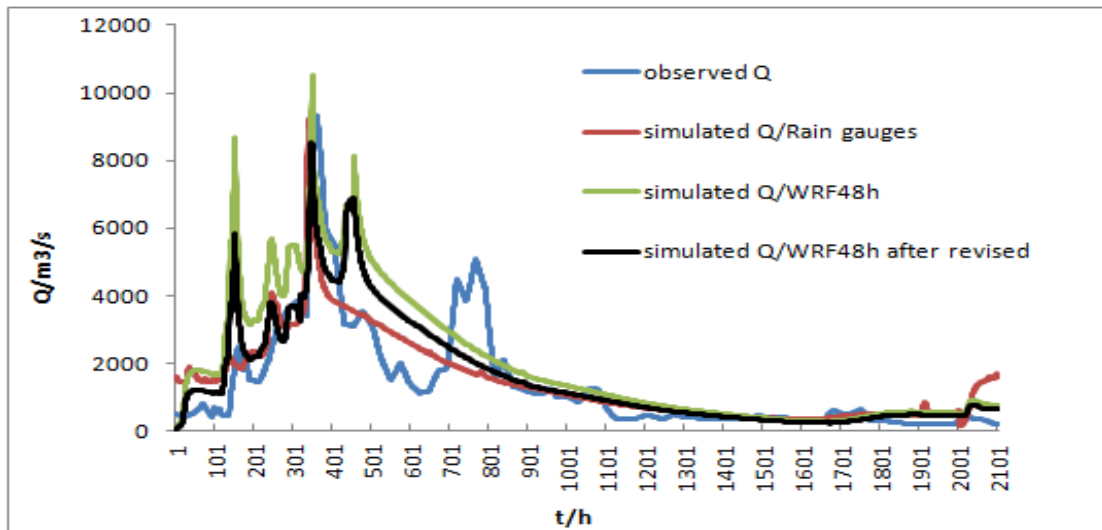

552

553

(b) 48 hour lead time

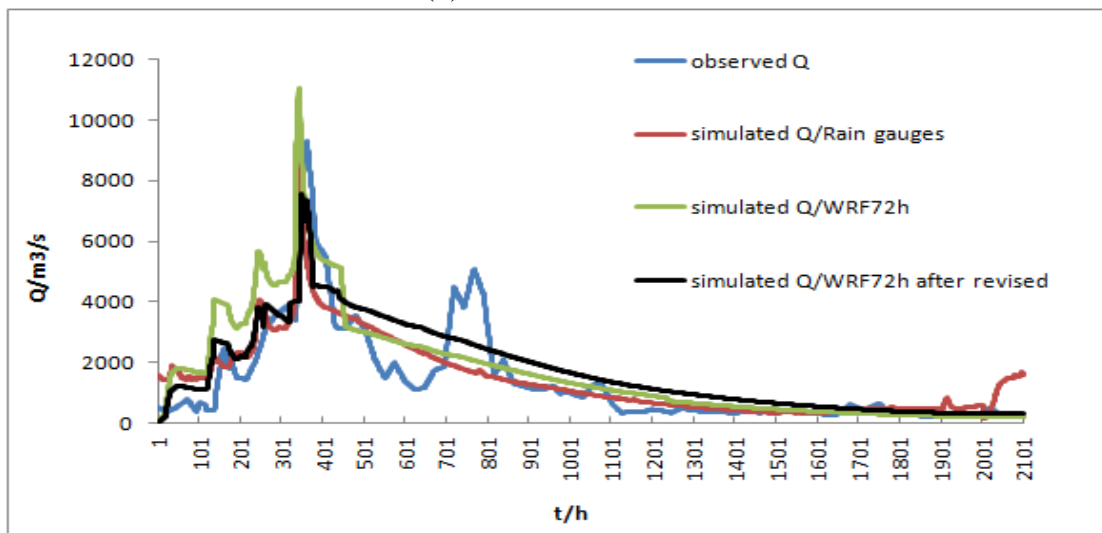

554

555

556

(c) 72 hour lead time

Fig. 7 Coupled flood simulation results with original model parameters (2011)

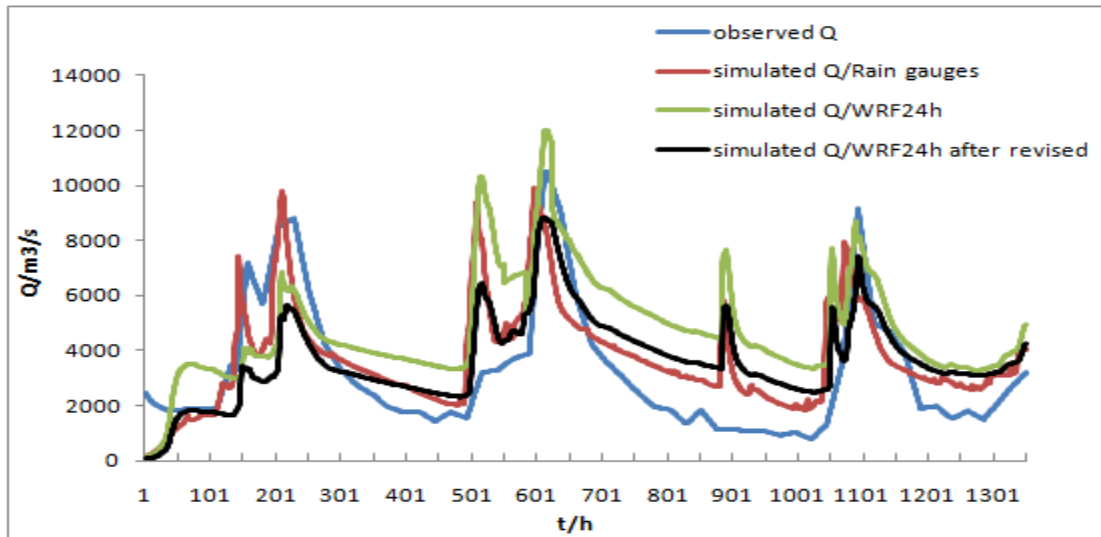

557  
558

(a) 24 hour lead time

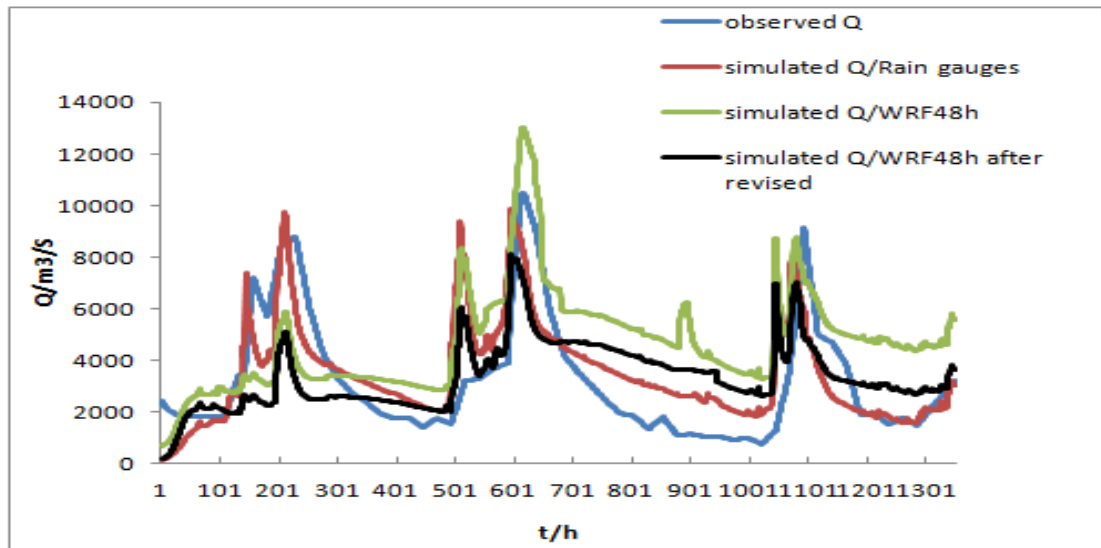

559  
560

(b) 48 hour lead time

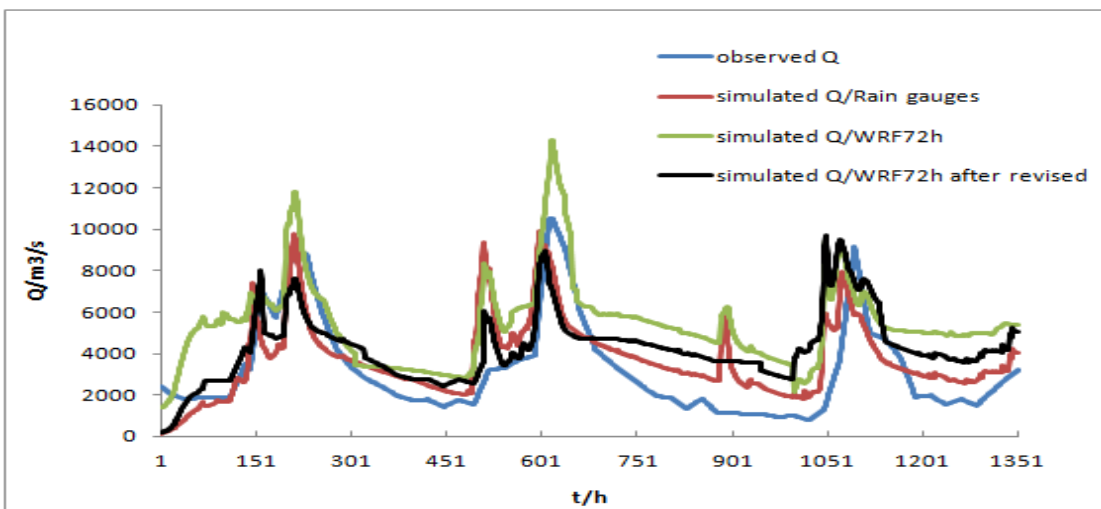

561  
562  
563

(c) 72 hour lead time

Fig. 8 Coupled flood simulation results with original model parameters(2012)



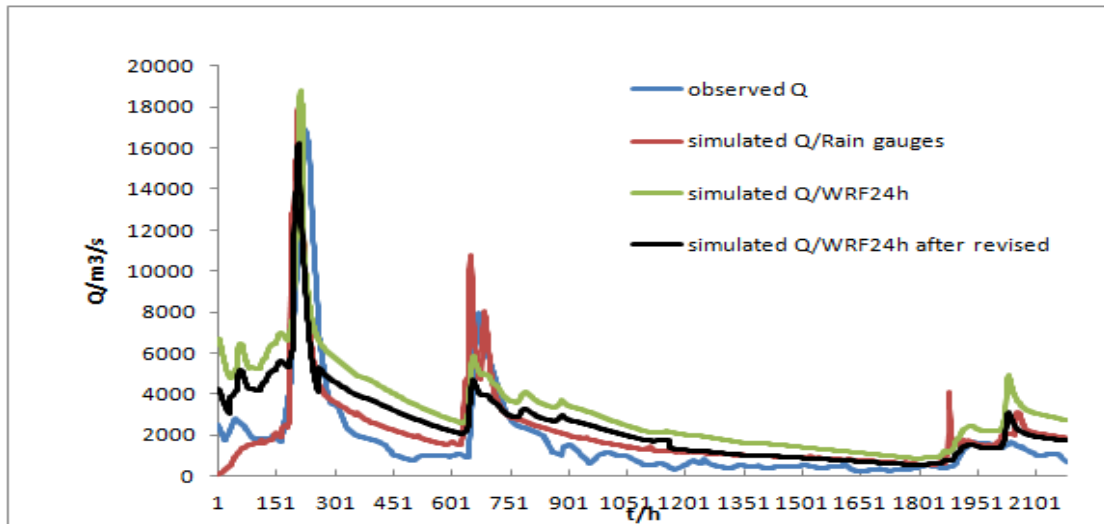

564  
565

(a) 24 hour lead time

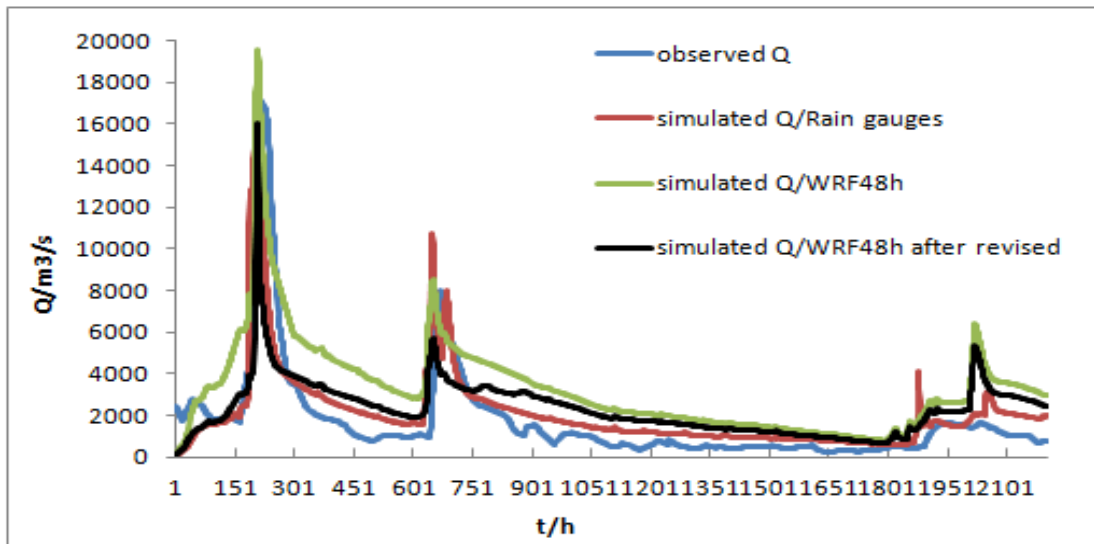

566  
567

(b) 48 hour lead time

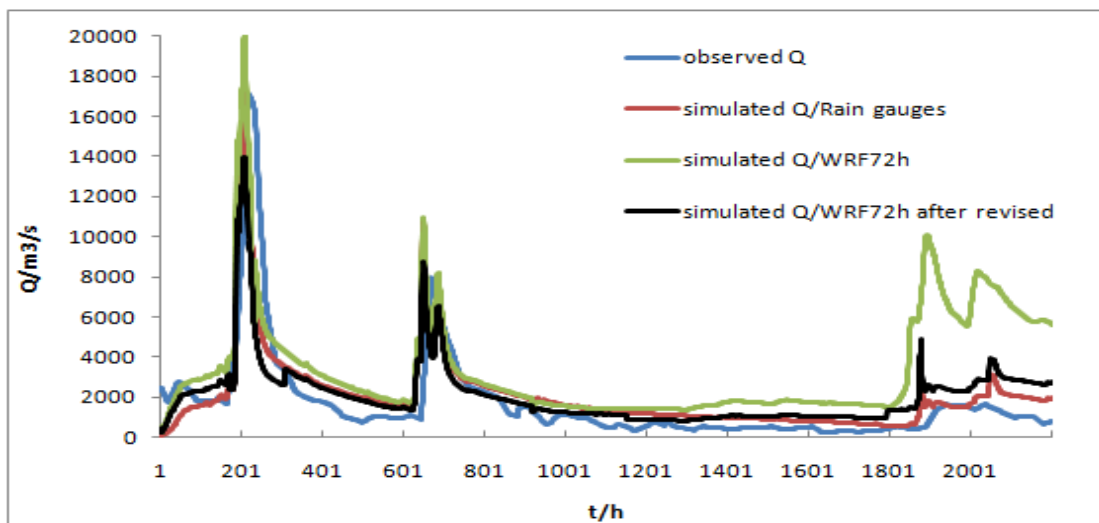

568  
569  
570

(c) 72 hour lead time

Fig. 9 Coupled flood simulation results with original model parameters (2013)

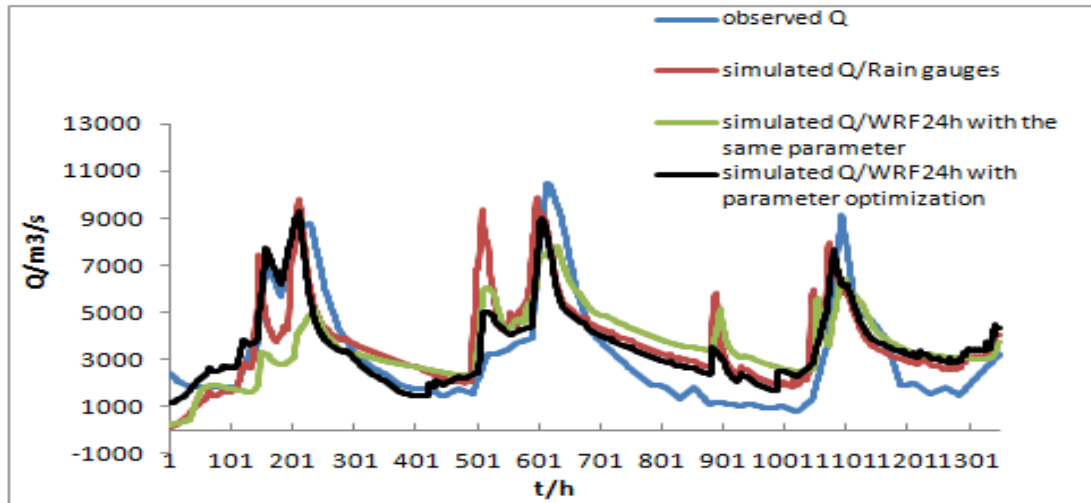

571

572

(a) 24 hour lead time

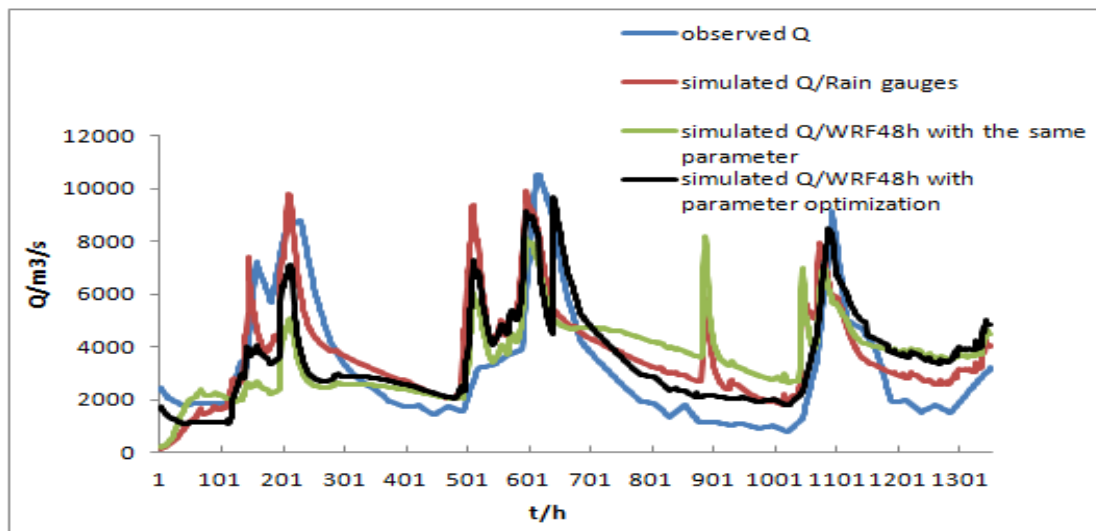

573

574

(b) 48 hour lead time

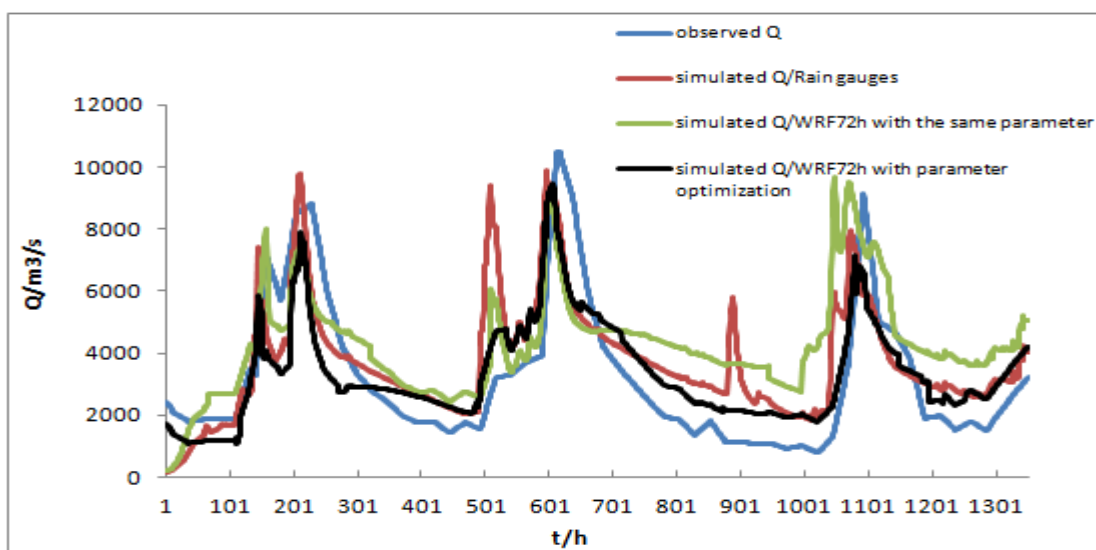

575

576

577

(c) 72 hour lead time

Fig. 10 Coupled flood simulation results with re-optimized model parameters (2012)

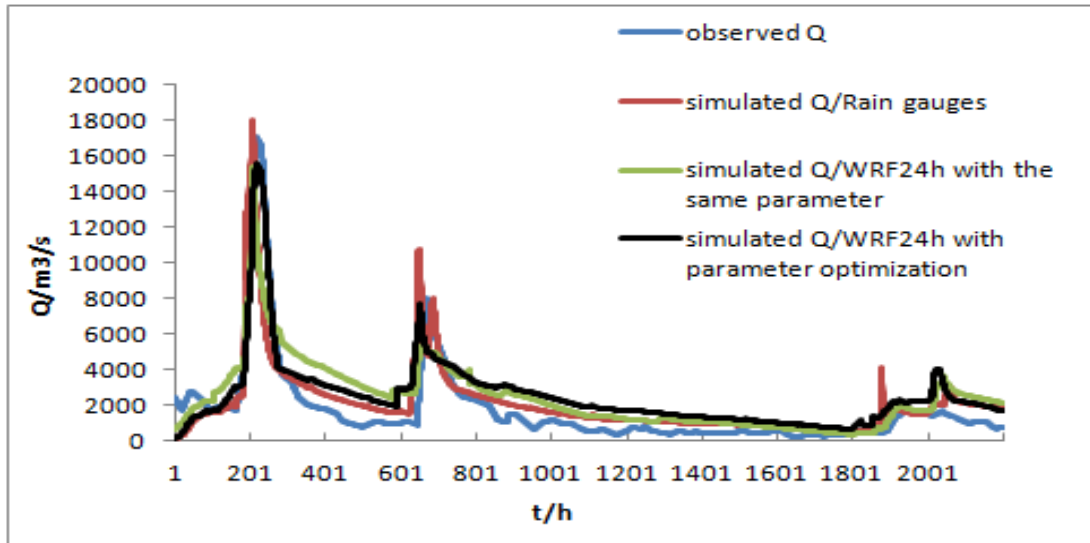

578

579

(a) 24 hour lead time

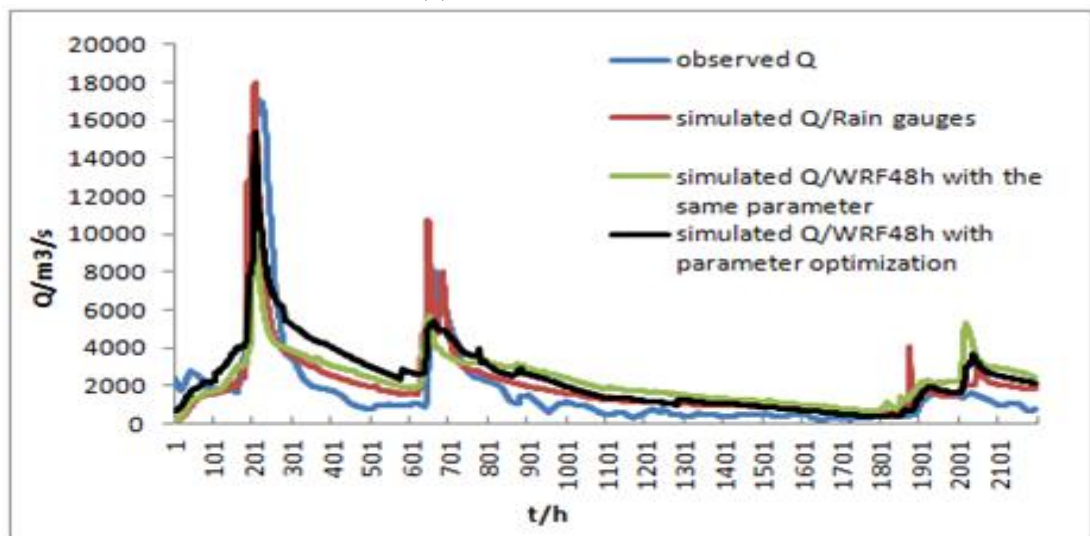

580

581

(b) 48 hour lead time

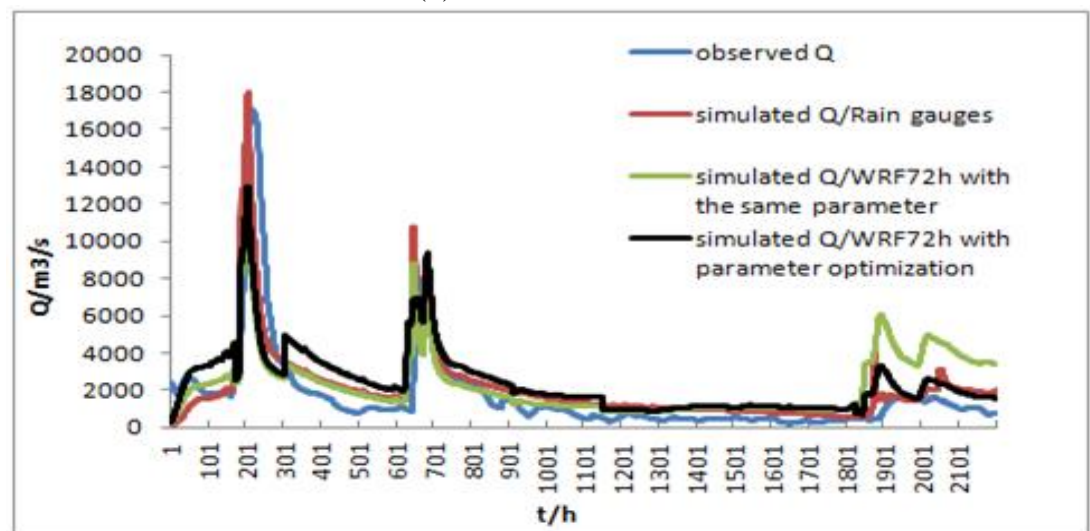

582

583

584

(c) 72 hour lead time

Fig. 11 Coupled flood simulation results with re-optimized model parameters (2013)

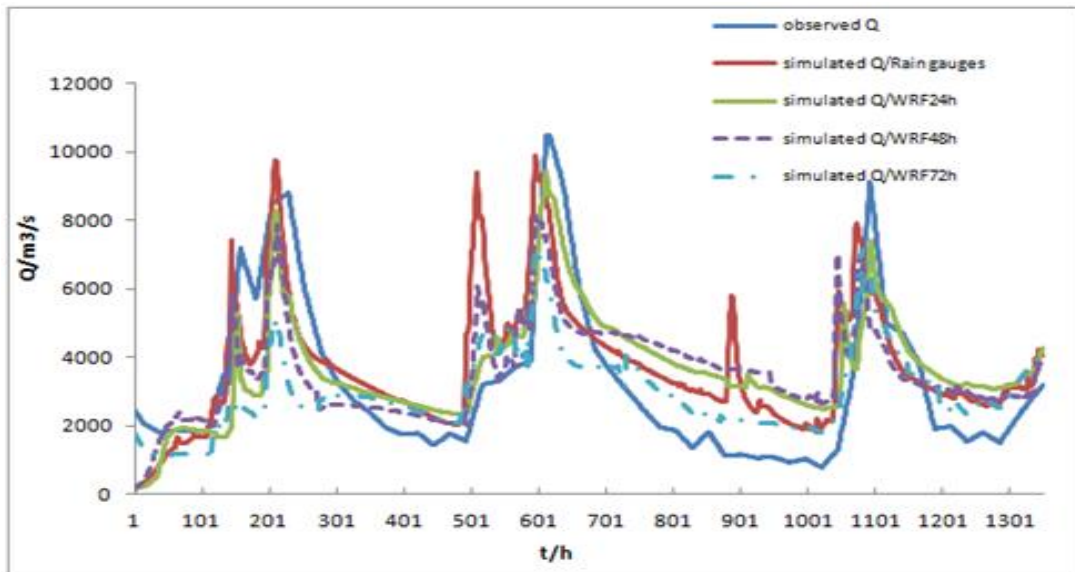

585  
586

(a) Flood event 2012

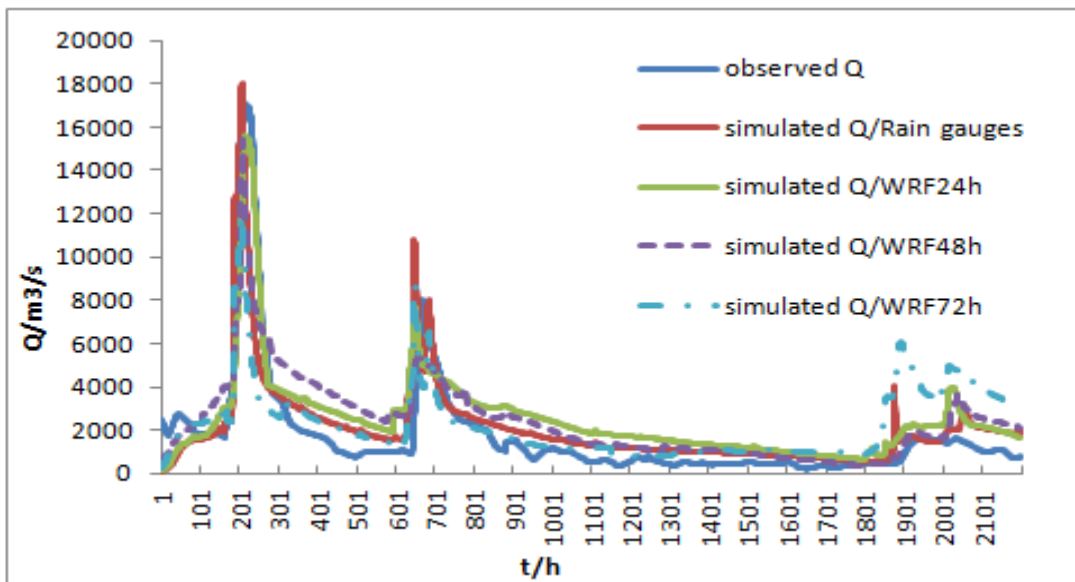

587  
588  
589  
590

(b) Flood event 2013

Fig. 12 Simulated results with different lead time

591 **Tables**

592 Table 1 Precipitation comparison of two products

| Flood event no. | Precipitation products | average precipitation(mm) | relative bias % |
|-----------------|------------------------|---------------------------|-----------------|
| 2011            | rain gauges            | 0.22                      |                 |
|                 | WRF/24h                | 0.27                      | 23              |
|                 | WRF/48h                | 0.29                      | 32              |
|                 | WRF/72h                | 0.34                      | 55              |
| 2012            | rain gauges            | 0.38                      |                 |
|                 | WRF/24h                | 0.44                      | 16              |
|                 | WRF/48h                | 0.52                      | 37              |
|                 | WRF/72h                | 0.65                      | 71              |
| 2013            | rain gauges            | 0.22                      |                 |
|                 | WRF/24h                | 0.33                      | 50              |
|                 | WRF/48h                | 0.38                      | 73              |
|                 | WRF/72h                | 0.43                      | 95              |

593

594

595 Table 2 Evaluation indices of simulated flood events with post-processed WRF QPF

| Rain type | statistical index                  | 201101010 | 20120101 | 20130101 |
|-----------|------------------------------------|-----------|----------|----------|
| WRF/24h   | Nash-Sutcliffe coefficient/C       | 0.65      | 0.66     | 0.65     |
|           | Correlation coefficient/R          | 0.88      | 0.73     | 0.83     |
|           | Process relative error/P           | 0.35      | 0.57     | 0.19     |
|           | Peak flow relative error/E         | 0.14      | 0.18     | 0.25     |
|           | The coefficient of water balance/W | 1.44      | 1.35     | 1.38     |

|                       |                                    |      |      |      |
|-----------------------|------------------------------------|------|------|------|
| WRF/24h after revised | Nash-Sutcliffe coefficient/C       | 0.75 | 0.75 | 0.75 |
|                       | Correlation coefficient/R          | 0.93 | 0.82 | 0.85 |
|                       | Process relative error/P           | 0.23 | 0.35 | 0.11 |
|                       | Peak flow relative error/E         | 0.08 | 0.12 | 0.16 |
|                       | The coefficient of water balance/W | 1.15 | 1.08 | 1.12 |
| WRF/48h               | Nash-Sutcliffe coefficient/C       | 0.58 | 0.63 | 0.5  |
|                       | Correlation coefficient/R          | 0.78 | 0.75 | 0.8  |
|                       | Process relative error/P           | 0.52 | 0.48 | 0.34 |
|                       | Peak flow relative error/E         | 0.41 | 0.12 | 0.24 |
|                       | The coefficient of water balance/W | 1.52 | 1.43 | 1.51 |
| WRF/48h after revised | Nash-Sutcliffe coefficient/C       | 0.64 | 0.75 | 0.62 |
|                       | Correlation coefficient/R          | 0.82 | 0.84 | 0.86 |
|                       | Process relative error/P           | 0.45 | 0.26 | 0.22 |
|                       | Peak flow relative error/E         | 0.34 | 0.08 | 0.13 |
|                       | The coefficient of water balance/W | 1.22 | 1.32 | 1.24 |
| WRF/72h               | Nash-Sutcliffe coefficient/C       | 0.45 | 0.48 | 0.44 |
|                       | Correlation coefficient/R          | 0.68 | 0.36 | 0.75 |
|                       | Process relative error/P           | 0.64 | 0.62 | 1.29 |

|                       |                                    |      |      |      |
|-----------------------|------------------------------------|------|------|------|
|                       | Peak flow relative error/E         | 0.31 | 0.35 | 0.45 |
|                       | The coefficient of water balance/W | 1.67 | 1.54 | 1.66 |
| WRF/72h after revised | Nash-Sutcliffe coefficient/C       | 0.52 | 0.58 | 0.55 |
|                       | Correlation coefficient/R          | 0.75 | 0.45 | 0.82 |
|                       | Process relative error/P           | 0.53 | 0.52 | 0.98 |
|                       | Peak flow relative error/E         | 0.11 | 0.22 | 0.23 |
|                       | The coefficient of water balance/W | 1.15 | 1.14 | 1.25 |

596

597 Table 3 Evaluation indices of simulated flood event with different model parameters

| parameter type                                                    | statistical index                  | 201101010 | 20120101 | 20130101 |
|-------------------------------------------------------------------|------------------------------------|-----------|----------|----------|
| Coupling model<br>24h/originally<br>optimized model<br>parameters | Nash-Sutcliffe coefficient/C       | 0.75      | 0.58     | 0.75     |
|                                                                   | Correlation coefficient/R          | 0.93      | 0.82     | 0.85     |
|                                                                   | Process relative error/P           | 0.23      | 0.35     | 0.11     |
|                                                                   | Peak flow relative error/E         | 0.08      | 0.12     | 0.16     |
|                                                                   | The coefficient of water balance/W | 1.15      | 1.08     | 1.12     |
| Coupling<br>model24h /re-<br>optimized model<br>parameters        | Nash-Sutcliffe coefficient/C       | 0.78      | 0.74     | 0.87     |
|                                                                   | Correlation coefficient/R          | 0.95      | 0.86     | 0.87     |
|                                                                   | Process relative error/P           | 0.19      | 0.28     | 0.09     |
|                                                                   | Peak flow relative error/E         | 0.06      | 0.08     | 0.12     |
|                                                                   | The coefficient of water balance/W | 1.03      | 0.95     | 1.02     |

|                                                                   |                                       |      |      |      |
|-------------------------------------------------------------------|---------------------------------------|------|------|------|
| Coupling model<br>48h/originally<br>optimized model<br>parameters | Nash-Sutcliffe coefficient/C          | 0.64 | 0.75 | 0.62 |
|                                                                   | Correlation coefficient/R             | 0.82 | 0.84 | 0.86 |
|                                                                   | Process relative error/P              | 0.45 | 0.26 | 0.22 |
|                                                                   | Peak flow relative error/E            | 0.34 | 0.08 | 0.13 |
|                                                                   | The coefficient of water<br>balance/W | 1.22 | 1.32 | 1.24 |
| Coupling model<br>48h /re-optimized<br>model parameters           | Nash-Sutcliffe coefficient/C          | 0.72 | 0.75 | 0.68 |
|                                                                   | Correlation coefficient/R             | 0.86 | 0.87 | 0.89 |
|                                                                   | Process relative error/P              | 0.32 | 0.22 | 0.18 |
|                                                                   | Peak flow relative error/E            | 0.21 | 0.06 | 0.09 |
|                                                                   | The coefficient of water<br>balance/W | 1.05 | 1.12 | 1.06 |
| Coupling model<br>72h/originally<br>optimized model<br>parameters | Nash-Sutcliffe coefficient/C          | 0.52 | 0.75 | 0.55 |
|                                                                   | Correlation coefficient/R             | 0.75 | 0.45 | 0.82 |
|                                                                   | Process relative error/P              | 0.53 | 0.52 | 0.98 |
|                                                                   | Peak flow relative error/E            | 0.11 | 0.22 | 0.23 |
|                                                                   | The coefficient of water<br>balance/W | 1.15 | 1.14 | 1.25 |
| Coupling model<br>72h /re-optimized<br>model parameters           | Nash-Sutcliffe coefficient/C          | 0.62 | 0.72 | 0.61 |
|                                                                   | Correlation coefficient/R             | 0.78 | 0.56 | 0.87 |
|                                                                   | Process relative error/P              | 0.38 | 0.32 | 0.75 |
|                                                                   | Peak flow relative error/E            | 0.09 | 0.18 | 0.17 |
|                                                                   | The coefficient of water<br>balance/W | 1.08 | 1.02 | 1.05 |

598

599 Table 4 Evaluation indices of simulated flood event with different lead time

| Rain type  | statistical index                     | 20120101 | 20130101 |
|------------|---------------------------------------|----------|----------|
| Rain gages | Nash-Sutcliffe<br>coefficient/C       | 0.82     | 0.95     |
|            | Correlation coefficient/R             | 0.89     | 0.92     |
|            | Process relative error/P              | 0.2      | 0.08     |
|            | Peak flow relative error/E            | 0.05     | 0.06     |
|            | The coefficient of water<br>balance/W | 0.8      | 1.08     |
| WRF/24h    | Nash-Sutcliffe<br>coefficient/C       | 0.74     | 0.87     |
|            | Correlation coefficient/R             | 0.86     | 0.87     |



|         |                                    |      |      |
|---------|------------------------------------|------|------|
|         | Process relative error/P           | 0.28 | 0.09 |
|         | Peak flow relative error/E         | 0.08 | 0.12 |
|         | The coefficient of water balance/W | 0.95 | 1.02 |
| WRF/48h | Nash-Sutcliffe coefficient/C       | 0.63 | 0.62 |
|         | Correlation coefficient/R          | 0.84 | 0.86 |
|         | Process relative error/P           | 0.48 | 0.22 |
|         | Peak flow relative error/E         | 0.12 | 0.13 |
|         | The coefficient of water balance/W | 1.32 | 1.24 |
| WRF/72h | Nash-Sutcliffe coefficient/C       | 0.56 | 0.61 |
|         | Correlation coefficient/R          | 0.56 | 0.87 |
|         | Process relative error/P           | 0.56 | 0.75 |
|         | Peak flow relative error/E         | 0.18 | 0.17 |
|         | The coefficient of water balance/W | 1.54 | 1.66 |

600

601

603 **References**

- 604 [1] Abbott, M. B., Bathurst, J. C., Cunge, J. A., O’Connell, P. E., and Rasmussen, J.:  
605 An Introduction to the European Hydrologic System-System Hydrologue  
606 Europeen, “SHE”, a: History and Philosophy of a Physically-based, Distributed  
607 Modelling System, *J. Hydrol.*, 87, 45–59, 1986a.
- 608 [2] Abbott, M. B., Bathurst, J. C., Cunge, J. A., O’Connell, P. E., and Rasmussen, J.:  
609 An Introduction to the European Hydrologic System-System Hydrologue  
610 Europeen, “SHE”, b: Structure of a Physically based, distributed modeling  
611 System, *J. Hydrol.*, 87, 61-77, 1986b.
- 612 [3] Ahlgrimm, Maïke, Richard M. Forbes, Jean-Jacques Morcrette, and Roel A. J.  
613 Neggers.: ARM’s Impact on Numerical Weather Prediction at ECMWF, 57,1-12,  
614 2016.
- 615 [4] Barnier, B., L. Siefridt, P. Marchesiello.: Thermal forcing for a global ocean  
616 circulation model using a three-year climatology of ECMWF analyses. *Journal of*  
617 *Marine Systems* ,6, 363-380, 1995.
- 618 [5] Borga, M., Borga, E.N.: Anagnostou, G. Bloschl d, J.D. Creutine. Flash flood  
619 forecasting, warning and risk management: the HYDRATE project, *Environmental*  
620 *science&policy*, 14, 834-844, 2011.
- 621 [6] Buizza, R., M. Miller and T. N. Palmer.: Stochastic representation of model  
622 uncertainties in the ECMWF Ensemble Prediction System, *Q. J. R. Meteorol.*  
623 *Soc.*, 125, 2887-2908, 1999.
- 624 [7] Burnash, R. J.: “The NWS river forecast system-catchment modeling.” *Computer*  
625 *models of watershed hydrology*, V. P. Singh, ed., Water Resource Publications,  
626 Littleton, Colo, 311-366, 1995.
- 627 [8] Chen, Y.: *Liuxihe Model*, China Science and Technology Press, September 2009.
- 628 [9] Chen, Y., Ren, Q.W., Huang, F.H., Xu, H.J., and Cluckie, I.: *Liuxihe Model and*  
629 *its modeling to river basin flood*, *Journal of Hydrologic Engineering*, 16, 33-50,  
630 2011.
- 631 [10] Chen, Y., Dong Y., Zhang P.C.: Study on the method of flood forecasting of small  
632 and medium sized catchment, proceeding of the 2013 meeting of the Chinese  
633 Society of Hydraulic Engineering, 1001-1008, 2013.
- 634 [11] Chen, Y., Li J., Xu H. J.: Improving flood forecasting capability of physically  
635 based distributed hydrological model by parameter optimization, *Hydrol. Earth*  
636 *Syst. Sci.*, 20, 375-392, 2016.
- 637 [12] Chen, Y., Li, J., Wang, H., Qin, J., and Dong, L.: Large watershed flood  
638 forecasting with high resolution distributed hydrological model, *Hydrol. Earth*  
639 *Syst. Sci.*, 21, 735-749, 2017.
- 640 [13] Danish Hydraulic Institute(DHI). MIKE11: A Modeling System for Rivers and  
641 Channels User-guide Manual, DHI, 2004.
- 642 [14] Gao, S., Lian Q.: Inspection and evaluation numerical forecast product of Japan in  
643 precipitation forecasting in Dandong, *Meteorological*, 6, 79-83, 2006.
- 644 [15] Giard, D. and E. Bazile.: Implementation of a New Assimilation Scheme for Soil  
645 and Surface Variables in a Global NWP Model, *Monthly weather review*, 128,  
646 997-1015, 2000.

- 647 [16]Givati, A., Barry L., Yubao Liu, and Alon Rimmer.:Using the WRF Model in an  
648 Operational Stream flow Forecast System for the Jordan River, 51,285-299. doi:  
649 10.1175/JAMC-D-11-082.1,2012.
- 650 [17]Han, D.W., Terence Kwong., and Simon Li.:Uncertainties in real-time flood  
651 forecasting with neural networks, *Hydrological. Process*, 21,223-228, 2007.
- 652 [18]Hong, S., and Lim, J.:The WRF Single-Moment 6-Class Microphysics Scheme  
653 (WSM6),*Journal of the Korean Meteorological Society*, 42,2,129-51,2006.
- 654 [19]Hong, Song-You, Ji-Woo Lee.:Assessment of the WRF model in reproducing a  
655 flash-flood heavy rainfall event over Korea, *Atmospheric Research*, 93,818-  
656 831,2009.
- 657 [20]Hu X., Tao J., Zheng F., Wang N., Zhang T., Liu S., and Shang D.:Synopsis the  
658 parameterized scheme of physical process of WRF, *Gansu Science and  
659 Technology*, 24,73-75, 2008.
- 660 [21]Huang, H.,Chen C., and Zhu W.:Impacts of Different Cloud Microphysical  
661 Processes and Horizontal Resolutions of WRF Model on Precipitation on  
662 Forecast Effect, *METEOROLOGICAL SCIENCE AND TECHNOLOGY*, 39,  
663 529-536, 2011.
- 664 [22]Jasper, Karsten, Joachim Gurtz, and Herbert Lang.:Advanced flood forecasting in  
665 Alpine watersheds by coupling meteorological observations and forecasts with a  
666 distributed hydrological model, *Journal of Hydrology*, 267, 40-52, 2002.
- 667 [23]Kain, J.S.:The Kain-Fritsch convective parameterization: An update. *Journal of  
668 Applied Meteorology and Climatology* 43,170-181, 2004.
- 669 [24]Kavvas, M., Chen, Z., Dogrul, C., Yoon, J., Ohara, N., Liang, L., Aksoy, H.,  
670 Anderson, M., Yoshitani, J., Fukami, K., and Matsuura, T.: "Watershed  
671 Environmental Hydrology (WEHY) Model Based on Upscaled Conservation  
672 Equations: Hydrologic Module." *J. Hydrol. Eng*, 6,450, 450-464, 2004.
- 673 [25]Kouwen, N.:WATFLOOD:A Micro-Computer based Flood Forecasting System  
674 based on Real-Time Weather Radar , *Canadian Water Resources Journal*, 13, 62-  
675 77, 1988.
- 676 [26]Kumar, Anil, J. Dudhia, R. Rotunno, Dev Niyogi and U. C.:Mohanty.:Analysis of  
677 the 26 July 2005 heavy rain event over Mumbai, India using the Weather  
678 Research and Forecasting (WRF)model, *Quarterly Journal of the royal  
679 meteorological society*, 34, 1897-1910, 2001.
- 680 [27]Li, H., Hanbing Liu, Ximin Yuan, Shukun Liu. The recognition theory of ANN  
681 and its application in flood forecasting, *Shui Li Xue Bao*, 06,15-19, 2002.
- 682 [28]Li, Y, G.H. Lu, Z.Y. Wu, and Jun Shi. :Study of a dynamic downscaling scheme  
683 for quantitative precipitation forecasting, *Remote Sensing and GIS for Hydrology  
684 and Water Resources*, IAHS Pub, 108-113,doi:10.5194/piahs-368-108-2015,  
685 2015.
- 686 [29]Li, Z.H., and Dehui Chen.:The development and application of the operational  
687 ensemble prediction system at national meteorological center, *Journal of Applied  
688 Meteorological Science*, 13,1-15,2002.
- 689 [30]Liang, X., Lettenmaier, D.P., Wood, E.F., and Burges, S.J.:A simple  
690 hydrologically based model of land surface water and energy fluxes for general  
691 circulation models, *J. Geophys. Res*, 99, 14415-14428,1994.
- 692 [31]Liao,Z.H., Chen Y, Xu .H.J., Yan W.L., Ren Q.W.:Parameter Sensitivity  
693 Analysis of the Liuxihe Model Based on E-FAST Algorithm, *Tropical  
694 Geography*, 32, 6, 606-612, 2012.
- 695 [32]Liao, Z.H., Chen Y., Xu H.J., He J. X.:Study of Liuxihe Model for flood forecast  
696 of Tiantoushui Watershed, *Yangtze River*, 43, 20, 12-16, 2012.

- 697 [33]Lin, Y L, Farley R D, and Orville H D.:Bulk parameterization of the snow field in  
698 a cloud model. *Journal of Climate and Applied Meteorology*, 22, 1 065-1 092,  
699 1983.
- 700 [34]Madsen, H.: Parameter estimation in distributed hydrological catchment  
701 modelling using automatic calibration with multiple objectives, *Adv. Water*  
702 *Resour.*, 26, 205-216, 2003.
- 703 [35]Maussion, F., D. Scherer, R. Finkelnburg, J. Richters, W. Yang, and T.  
704 Yao.:WRF simulation of a precipitation event over the Tibetan Plateau,China –  
705 an assessment using remote sensing and ground Observations, *Hydrol. Earth*  
706 *Syst. Sci.*, 15, 1795-1817, doi:10.5194/hess-15-1795-2011,2011.
- 707 [36]Molteni, F., R. Buizza, T.N. Palmer and T. Petroliagi.:The ECMWF Ensemble  
708 Prediction System: Methodology and validation. *Meteorol. Soc.*, 122, 73-119,  
709 1996.
- 710 [37]Moreno, H. A., Enrique R. Vivoni, David J. Gochis.:Limits to Flood Forecasting  
711 in the Colorado Front Range for Two Summer Convection Periods Using Radar  
712 Nowcasting and a Distributed Hydrologic Model, *Journal of*  
713 *Hydrometeorology*, 14, 1075-1097, 2013.
- 714 [38]Niu, J. and Z. Yan.:The impact on the heavy rain forecast based on physical  
715 process of WRF.SCIENCE & TECHNOLOGY INFORMATION.23, 42-45,  
716 doi:10.3969/j.issn.1001-9960.2007.23.011,2007.
- 717 [39]Pan, X. D., Li X., Ran Y.H., and Liu C.:Impact of Underlying Surface  
718 Information on WRF Model in Heihe River Basin, *PLATEA*  
719 *UMETEOROLOGY*, 31, 657-667, 2012.
- 720 [40]Pennelly, C., Gerhard Reuter, Thomas Flesch.:Verification of the WRF model for  
721 simulating heavy precipitation in Alberta, *Atmospheric Research*, 135–136,172–  
722 192, 2014.
- 723 [41]Refsgaard, J. C.:Parameterisation, calibration and validation of distributed  
724 hydrological models, *J. Hydrol*, 198, 69–97,1997.
- 725 [42]Rutledge S.A., and Peter V. H.:The Mesoscale and Microscale Structure and  
726 Organization of Clouds and Precipitation in Midlatitude Cyclones.VIII:A Model  
727 for the "Seeder-Feeder" Process in Warm-Frontal Rainbands, *JOURANL OF*  
728 *THE ATMOSPHERIC SCIENCES*, 40,1185-1206,1983.
- 729 [43]Shafii, M. and Smedt, F. De.: Multi-objective calibration of a distributed  
730 hydrological model (WetSpa) using a genetic algorithm, *Hydrol. Earth Syst. Sci.*,  
731 13, 2137-2149, 2009.
- 732 [44]Sherman, L. K.: Streamflow from rainfall by the unit-graph method., *Eng. News-*  
733 *Rec.*, 108, 501–505,1982.
- 734 [45]Shim, Kyu-Cheoul, Darrell G. F., ASCE M., and John W. L.:Spatial Decision  
735 Support System for Integrated River Basin Flood Control, *Journal of Water*  
736 *Resources Planning and Management*, 128,3,190-201.doi: 10.1061/(ASCE)0733-  
737 9496(2002)128:3(190),2002.
- 738 [46]Skamarock, William C., Joseph B. Klemp, Jimmy Dudhia,, David O. Gill, Dale M.  
739 Barker, Wei Wang, and Jordan G. Powers.:A Description of the Advanced  
740 Research WRF Version 2,NCAR TECHNICAL NOTE,NCAR/TN–468,STR,  
741 2005.
- 742 [47]Skamarock, William C., Joseph B., Klemp Jimmy, Dudhia David, O. Gill, Dale M.  
743 Barker Michael, G. Duda, Xiangyu, Huang Wei Wang, Jordan G. Powers.:A  
744 Description of the Advanced Research WRF Version 3,NCAR TECHNICAL  
745 NOTE, NCAR/TN–468,STR, 2008.

- 746 [48]Takenaka, Hideaki, Takashi Y. Nakajima, Akiko Higurashi, Atsushi  
747 Higuchi,TamioTakamura, Rachiel T. Pinker, and Teruyuki Nakajima.:Estimation  
748 of solar radiation using a neural network based on radiative transfer, Journal of  
749 Geophysical Research, 116, D08215,1-26,doi:10.1029/2009JD013337, 2011.
- 750 [49]Tingsanchali, T.:Urban flood disaster management, Procedia Engineering, 32,25 -  
751 37,2012.
- 752 [50]Toth, E., A. Brath, A. Montanari.:Comparison of short-term rainfall prediction  
753 models for real-time flood forecasting ,Journal of Hydrology, 239,132-147,2000.
- 754 [51]Vieux, B. E., and Vieux, J. E.:VfloTM: A Real-time Distributed Hydrologic  
755 Model, In:Proceedings of the 2nd Federal Interagency Hydrologic Modeling  
756 Conference, July 28-August 1, Las Vegas, Nevada. Abstract and paper on CD-  
757 ROM, 2002.
- 758 [52]Wang, X.j, Ma H.:Progress of Application of the Weather Research and Forecast  
759 ( WRF) Model in China. ADVANCES IN EARTH SCIENCE, 26, 1191-  
760 1199,2011.
- 761 [53]Wang, Z., Batelaan, O., De Smedt, F.: A distributed model for water and energy  
762 transfer between soil, plants and atmosphere (WetSpa). Journal of Physics and  
763 Chemistry of the Earth 21, 189-193, 1997.
- 764 [54]Xu, G.Q, Liang X.D., Yu H., Huang L.P., and Xue J. S.:Precipitation Simulation  
765 Using Different Cloud-Precipitation Schemes for a Landfall Typhoon, PLATEA  
766 UMETEOROLOGY, 26, 891-900, 2007.
- 767 [55]Xu, H.J., Chen Y., Zeng B.Q., He J.X., Liao Z.H., Application of SCE-UA  
768 Algorithm to Parameter Optimization of Liuxihe Model, Tropical Geography, 1,  
769 32,1,32-37,2012.
- 770 [56]Xu, H.J., Chen Y., Li Z.Y., He J. X.:Analysis on parameter sensitivity of  
771 distributed hydrological model based on LH-OAT Method, Yangtze River,  
772 43,7,19-23,2012.
- 773 [57]Zappa, Massimiliano, Keith J. Beven, Michael Bruen, Antonio S. Cofino, Kok,  
774 Eric Martin, Pertti Nurmi, Bartlome Orfila, Emmanuel Roulin, Kai Schroter,  
775 Alan Seed, Jan Szturc, Bertel Vehvilainen, Urs Germann, and Andrea  
776 Rossa.:Propagation of uncertainty from observing systems and NWP into  
777 hydrological models: COST-731 Working Group 2,Atmospheric Science  
778 Letters,11,83-91,2010.
- 779 [58]Zhang, G.C.: Progress of Weather Research and Forecast (WRF) Model and  
780 Application in the United States.Meteorological,12, 27-31,2004.
- 781 [59]Zhao, R. J.:Flood forecasting method for humid regions of China, East China  
782 College of Hydraulic Engineering, Nanjing, China, 1977.
